# Supplementary material for: Bio-inspired enantioselective total syntheses of (−)-viminalins A, B, H, I, and N and structural reassignment of (−)-viminalin M
Source: Royal Society of Chemistry journal article supplement (doi:10.1039/c9ob01426h), 2019-01-01
Supplement: c9ob01426h1.pdf [file c9ob01426h1.pdf]

**“Bio-Inspired Enantioselective Total Syntheses of (–)-Viminalins A, B, H, I, N, and  
Structural Reassignment of (–)-Viminalin M”**

Dattatraya H. Dethe,\* and Appasaheb K. Nirpal

Department of Chemistry, Indian Institute of Technology Kanpur, Kanpur-208016, India.

## Table of Contents

|                                |      |
|--------------------------------|------|
| 1. NMR Spectras:.....          | S-3  |
| 2. NMR comparison Table:       |      |
| 2.1) (-)-Viminalin A (1):..... | S-20 |
| 2.2) (-)-Viminalin B (2):..... | S-21 |
| 2.3) (-)-Viminalin H (3):..... | S-22 |
| 2.4) (-)-Viminalin I (4):..... | S-23 |
| 2.5) (-)-Viminalin M (6):..... | S-24 |
| 2.6) (-)-Viminalin N (7):..... | S-25 |
| 3. References:.....            | S-26 |

# 1. NMR Spectras:

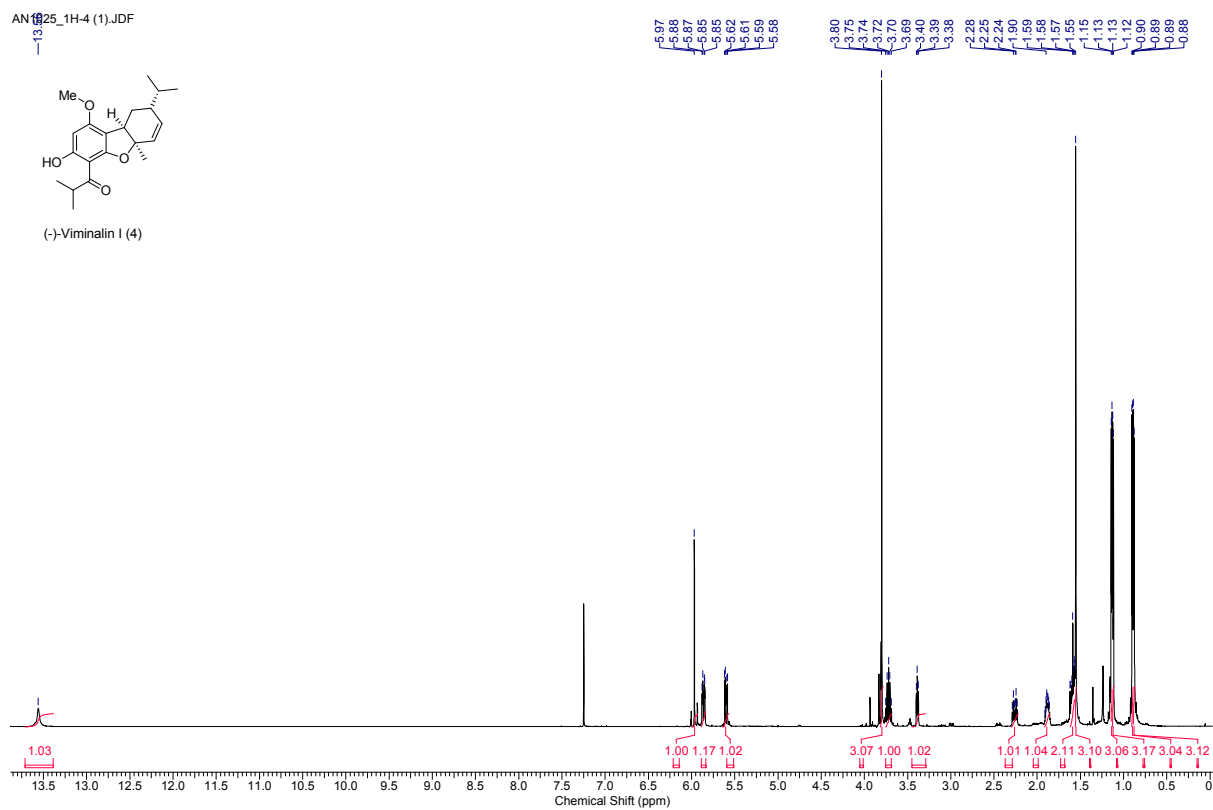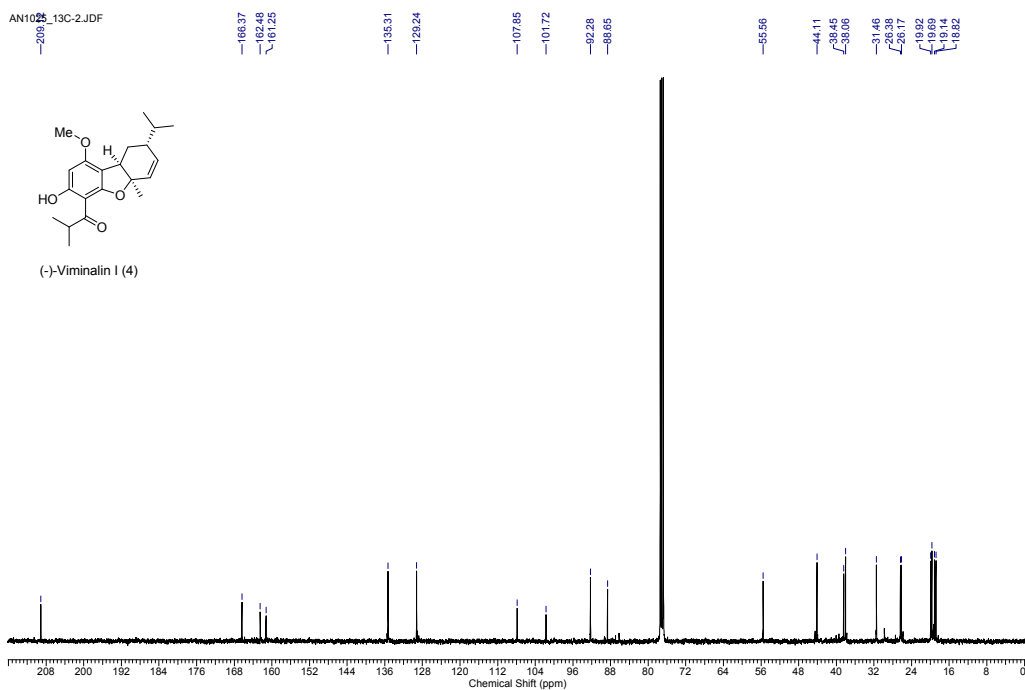

AN-944NA\_1H-4.JDF

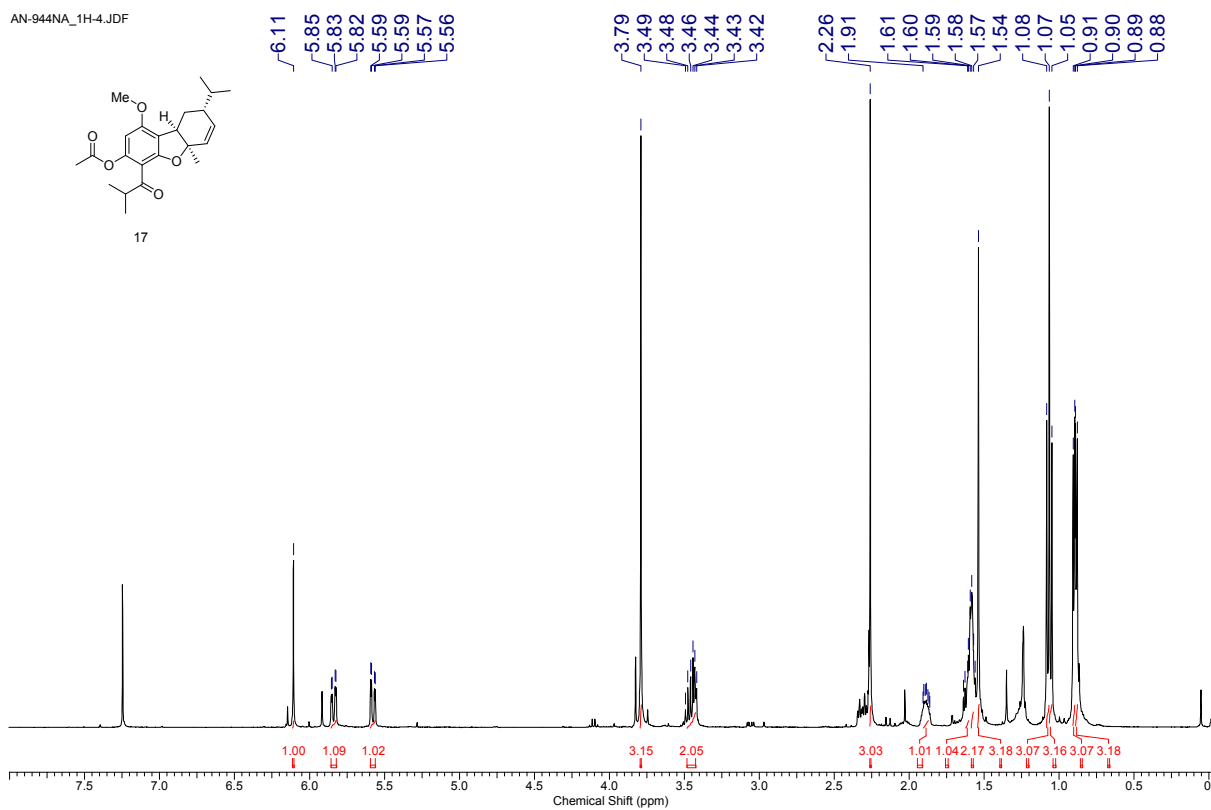

AN944NA\_13C-3.JDF

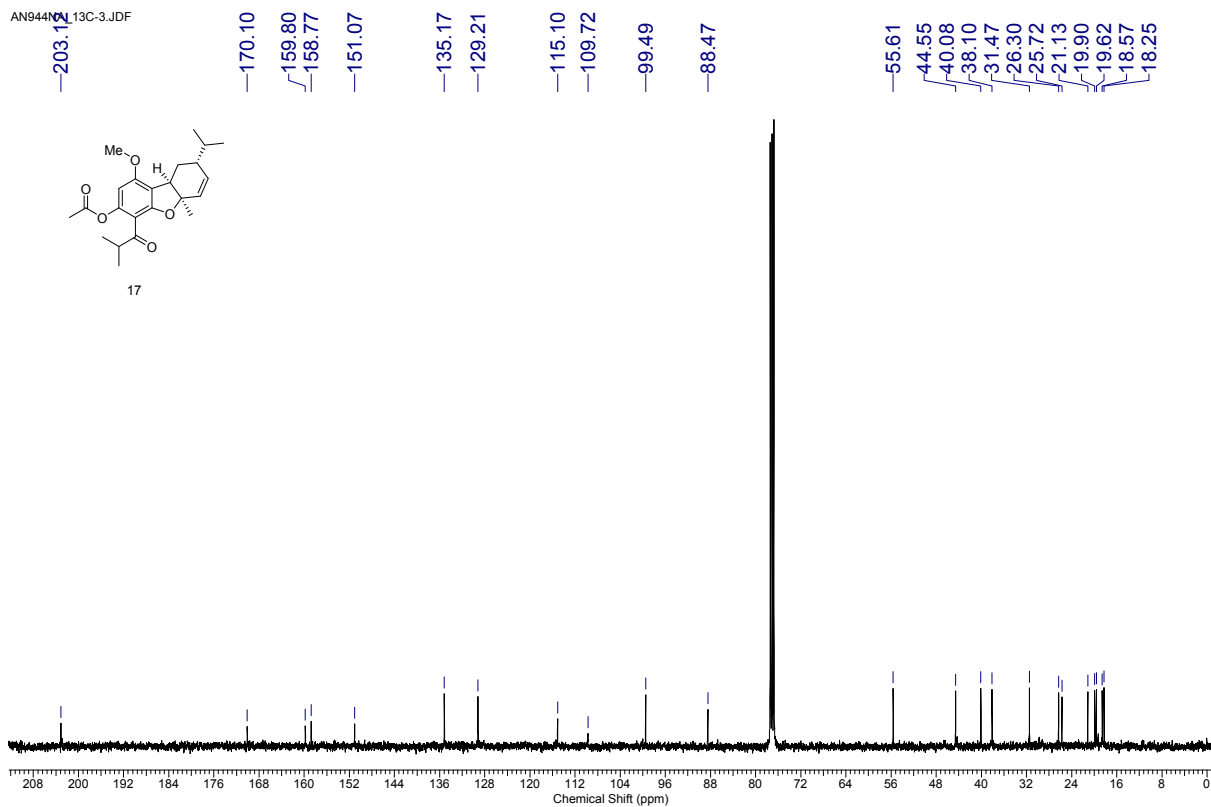

AN-1005N\_1H-4.JDF

-6.14

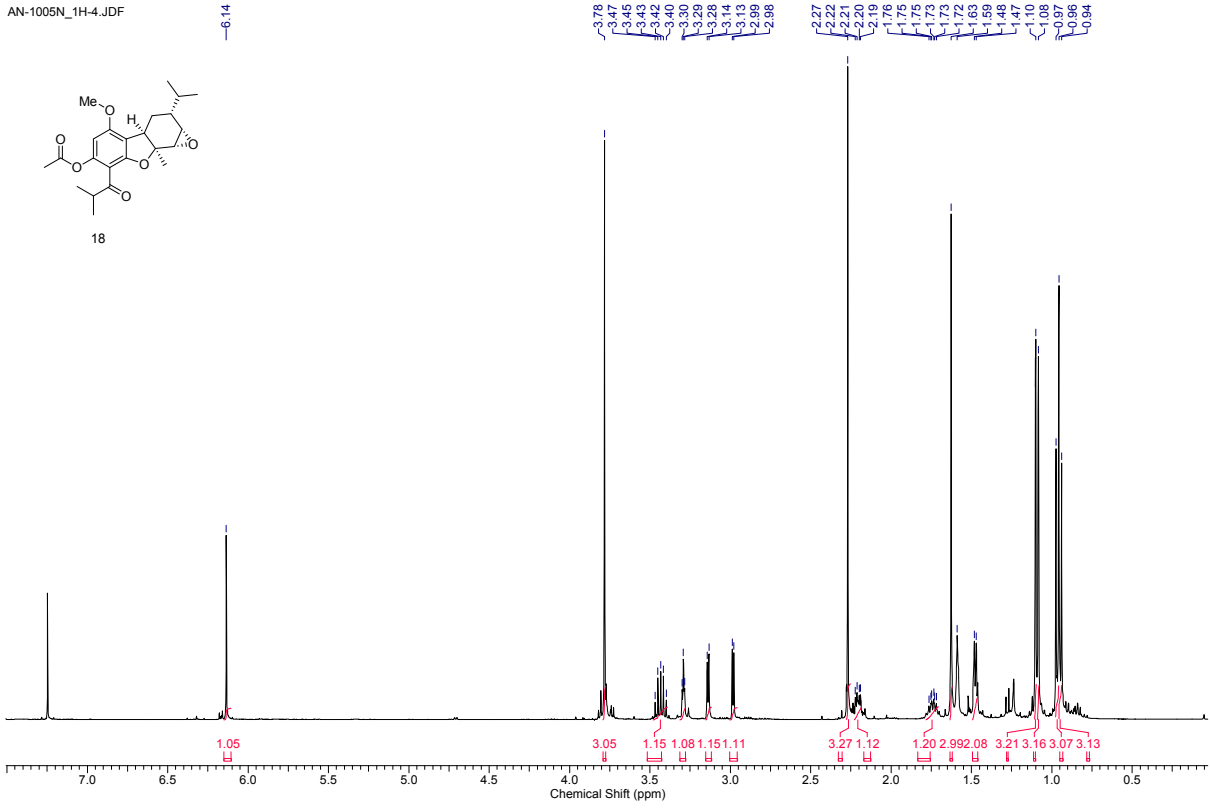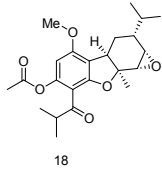

AN1005N\_13C-2 (5).JDF

-202.86

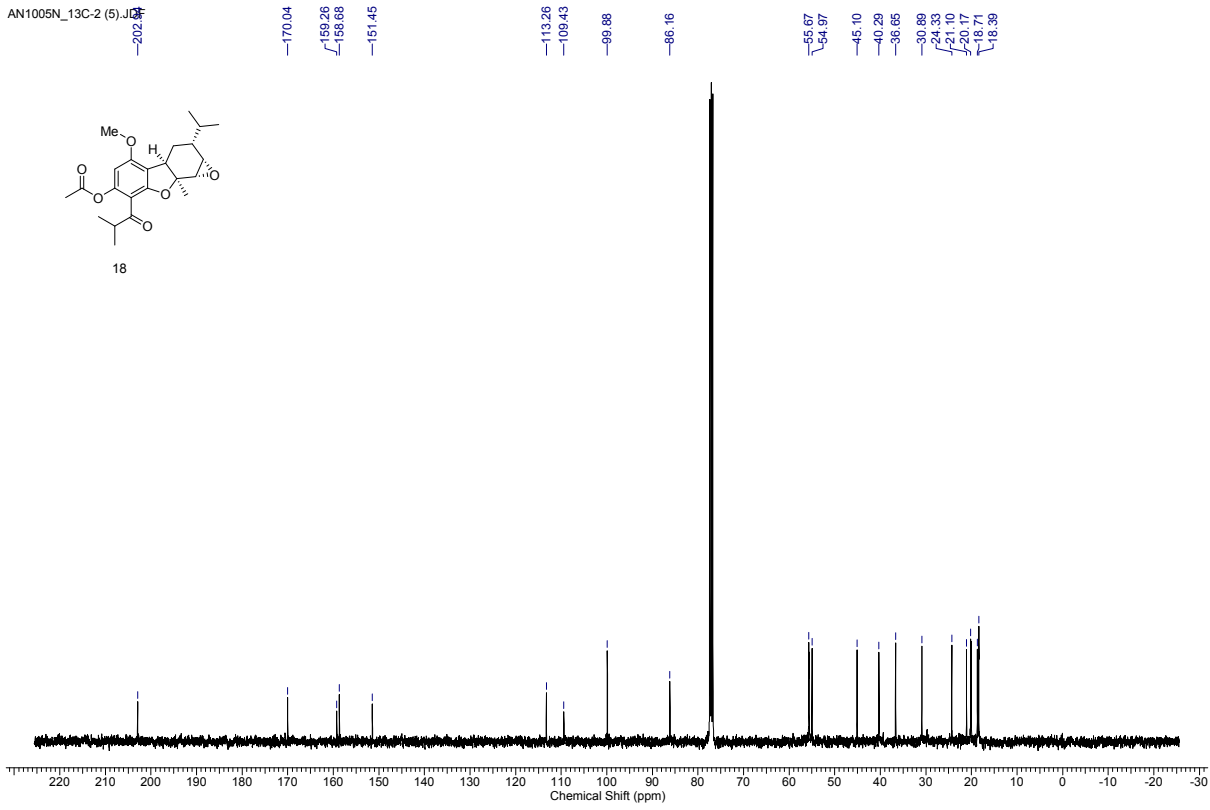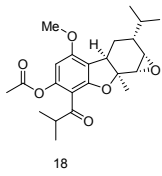

ANEP0970\_1H-4 (1).JDF

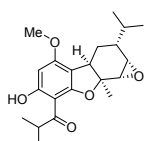

(-)-di-epi-Viminalin B (19)

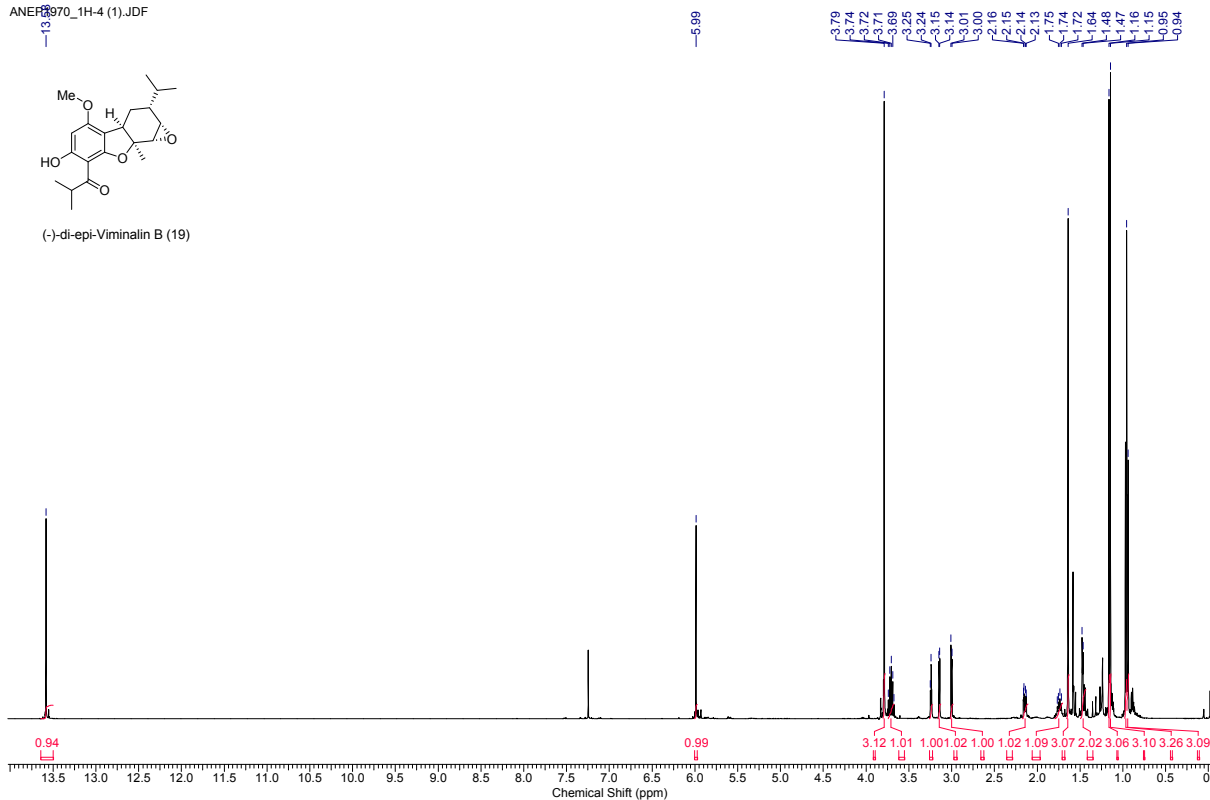

ANEP0970\_13C-2.JDF

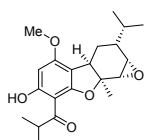

(-)-di-epi-Viminalin B (19)

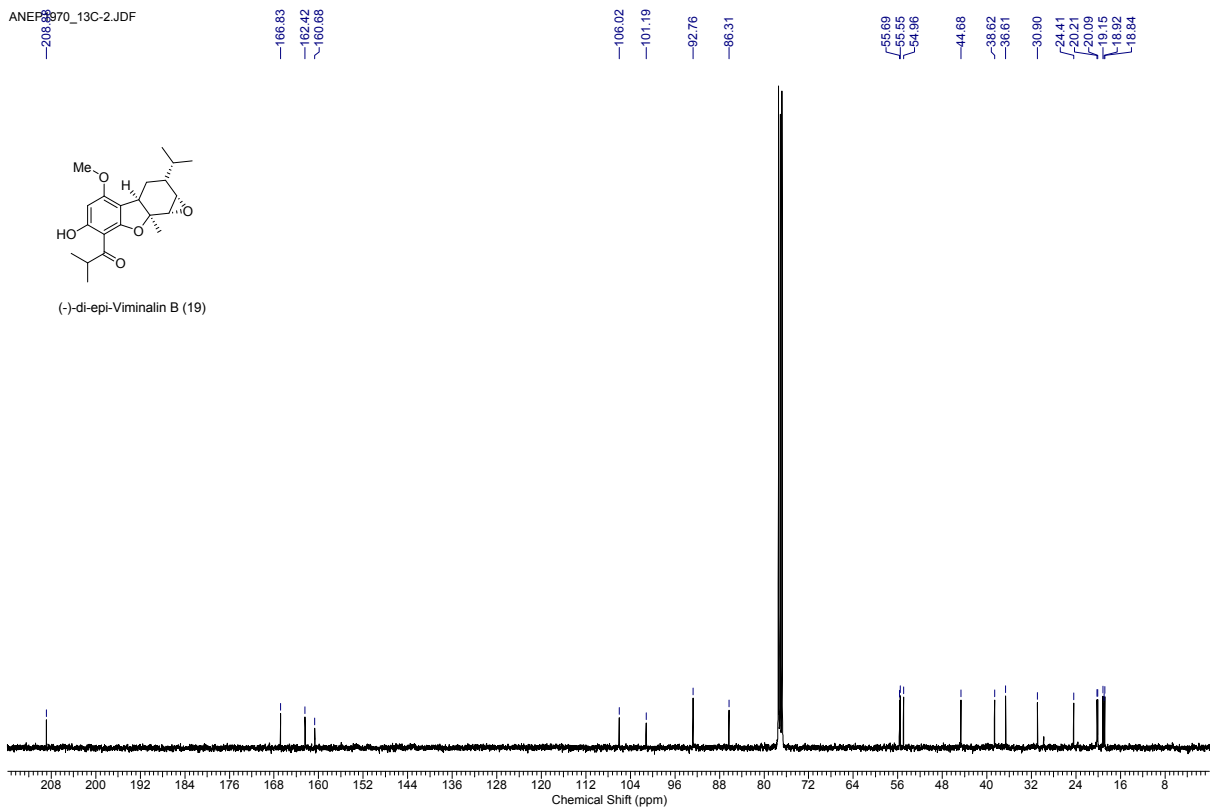

AN1036-1H (1).JDF

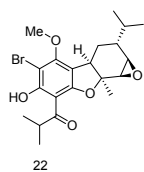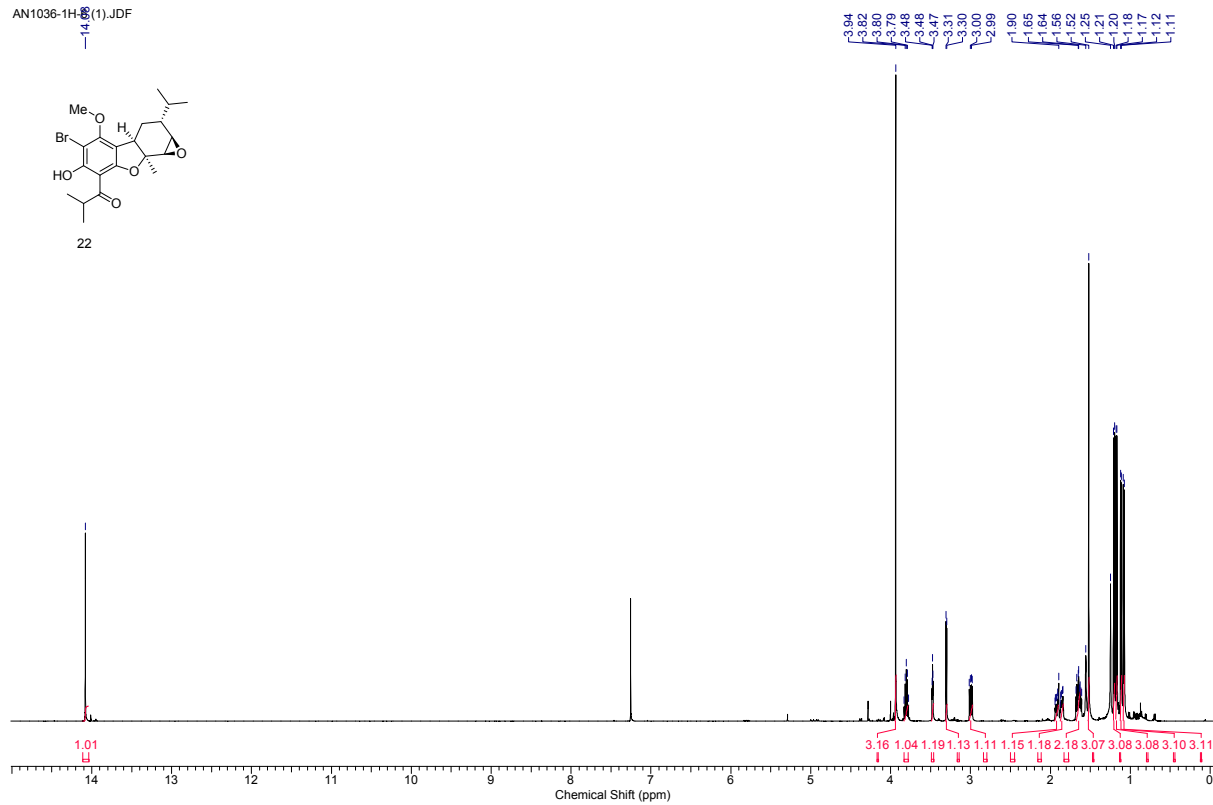

AN1036-13C-5 (1).JDF

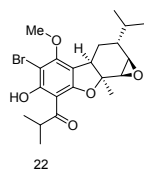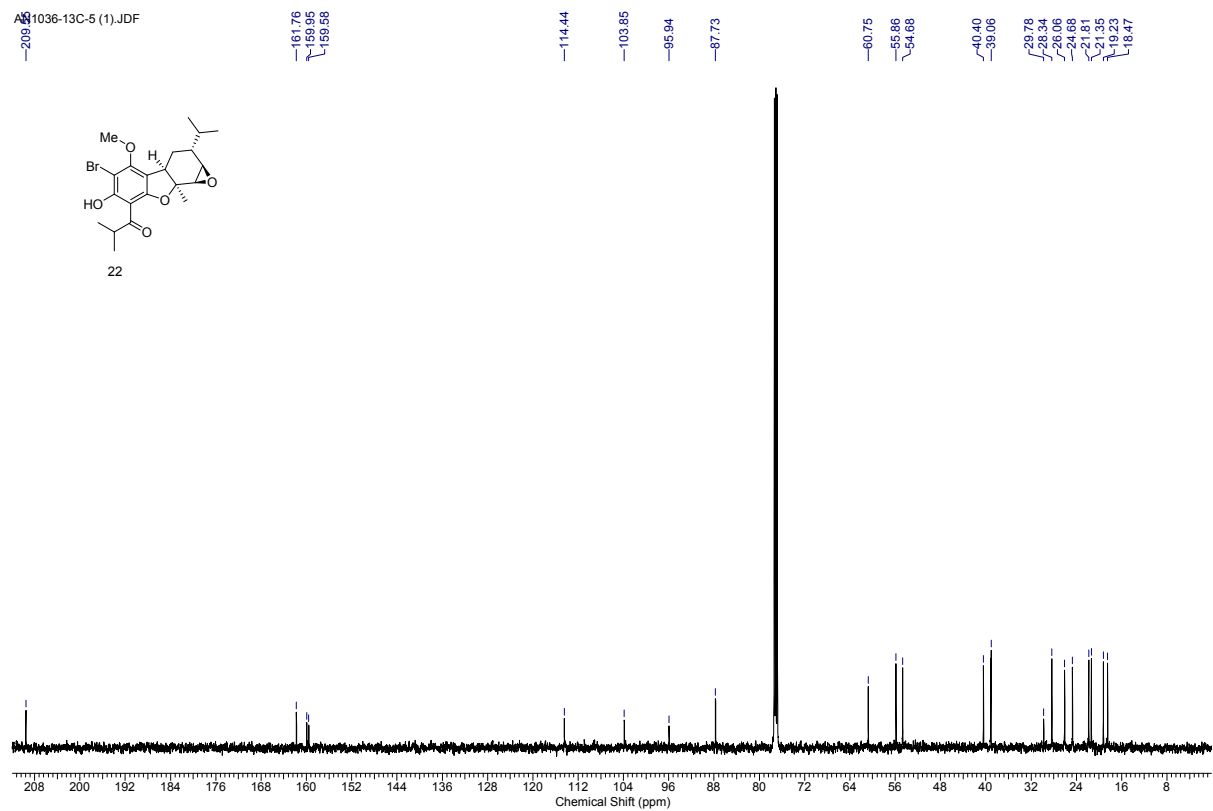

AN-970A\_1H-4 (1).JDF

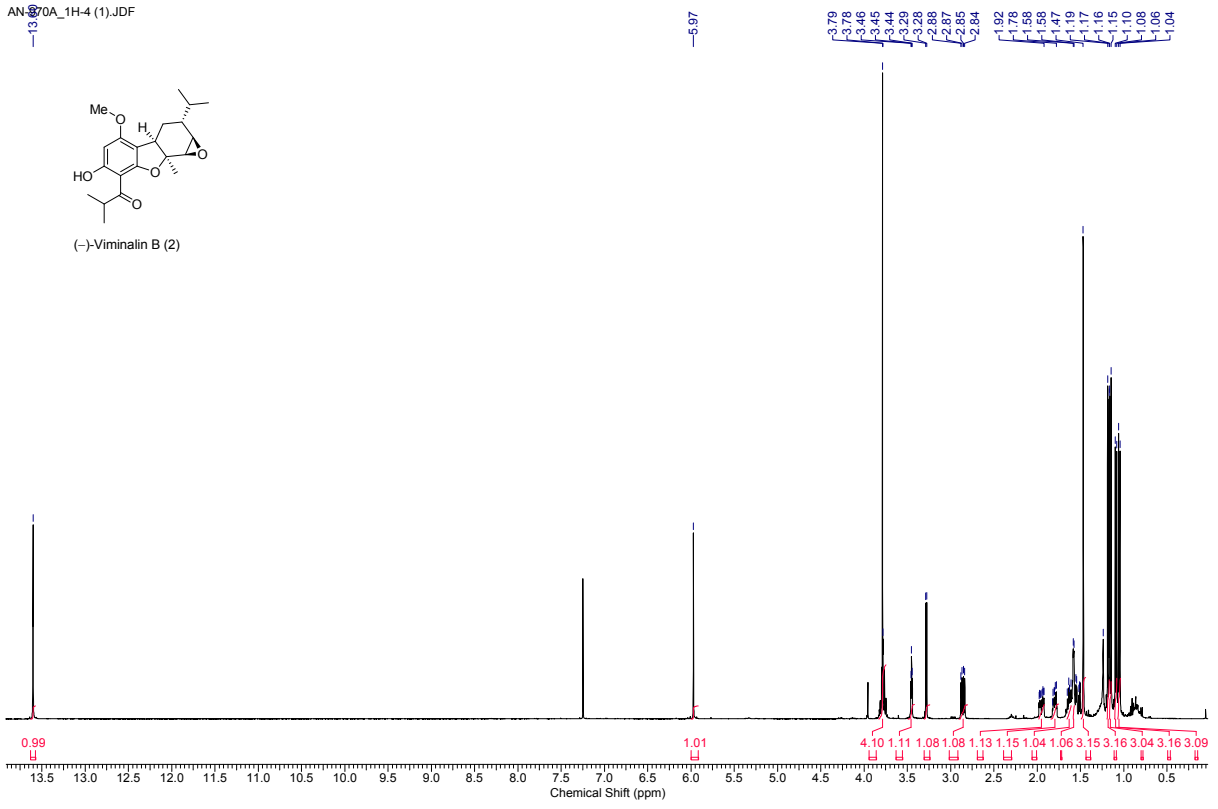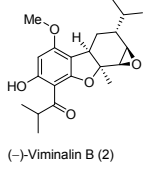

AN-970A\_13C-2.JDF

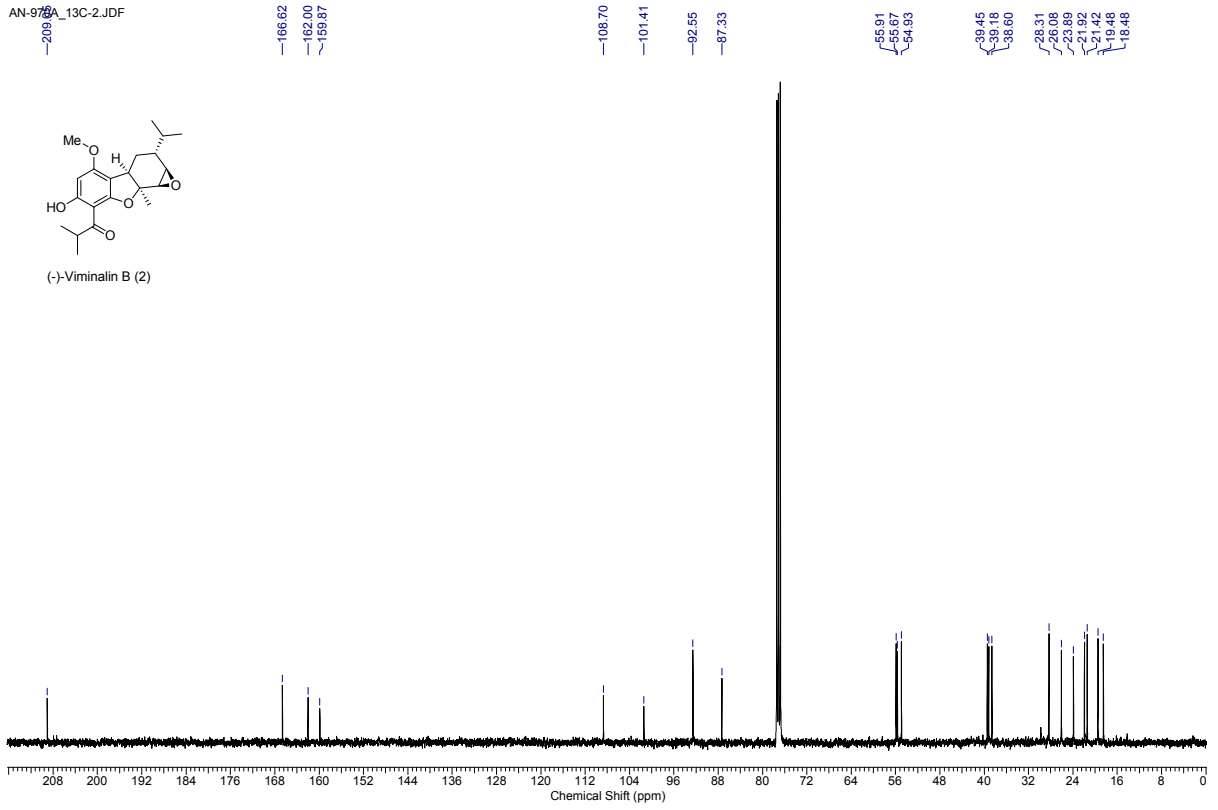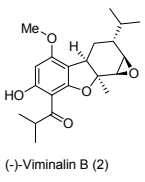



AN1800 PROTON-4.JDF

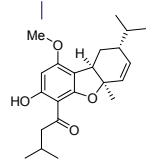

(-)-Viminalin H (3)

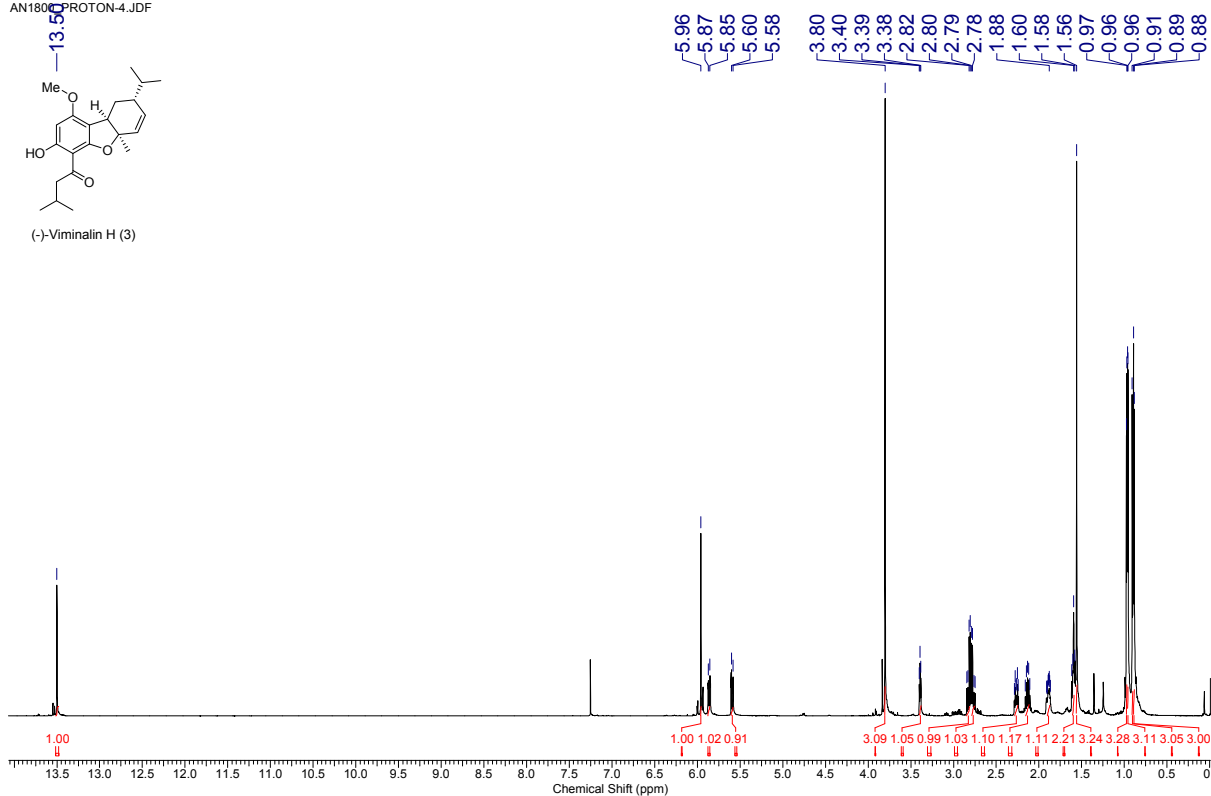

AN1800 CARBON-3.JDF

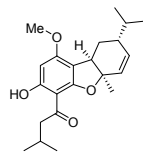

(-)-Viminalin H (3)

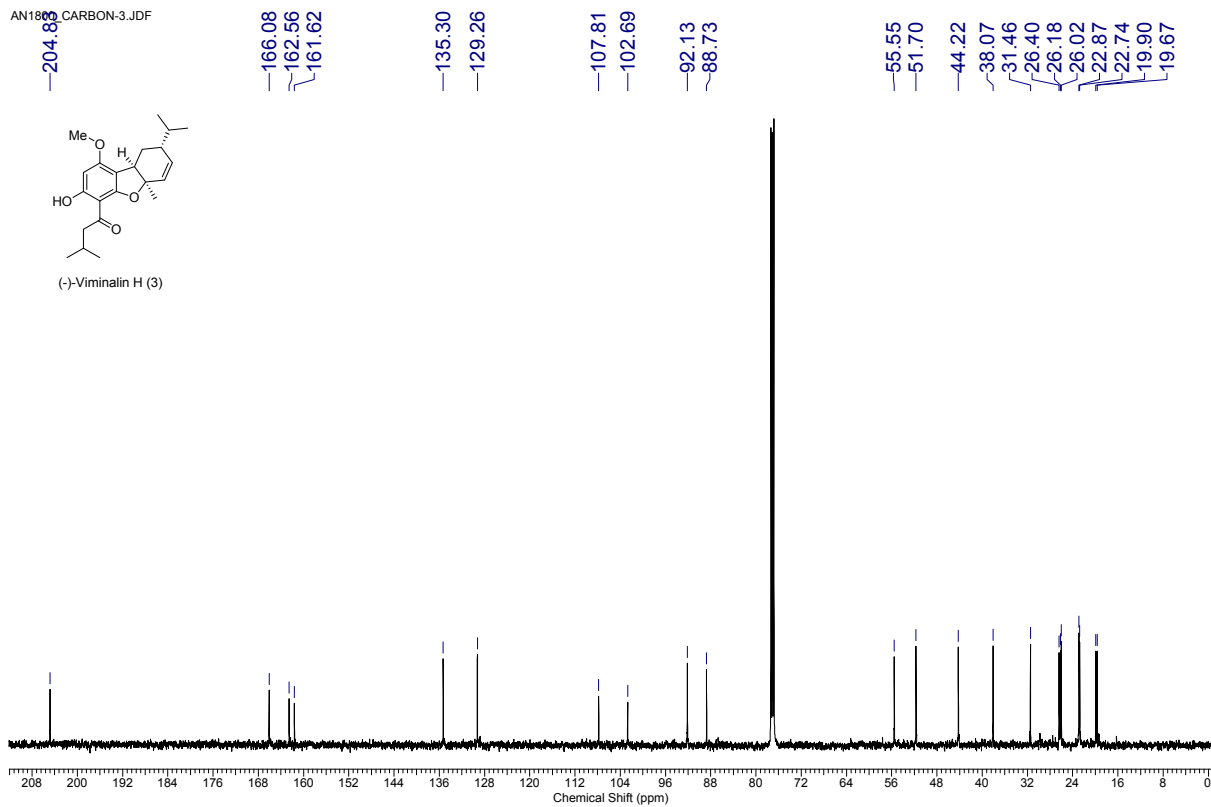

AN-952\_1H-1 (1).JDF

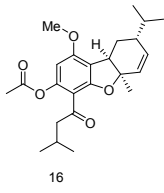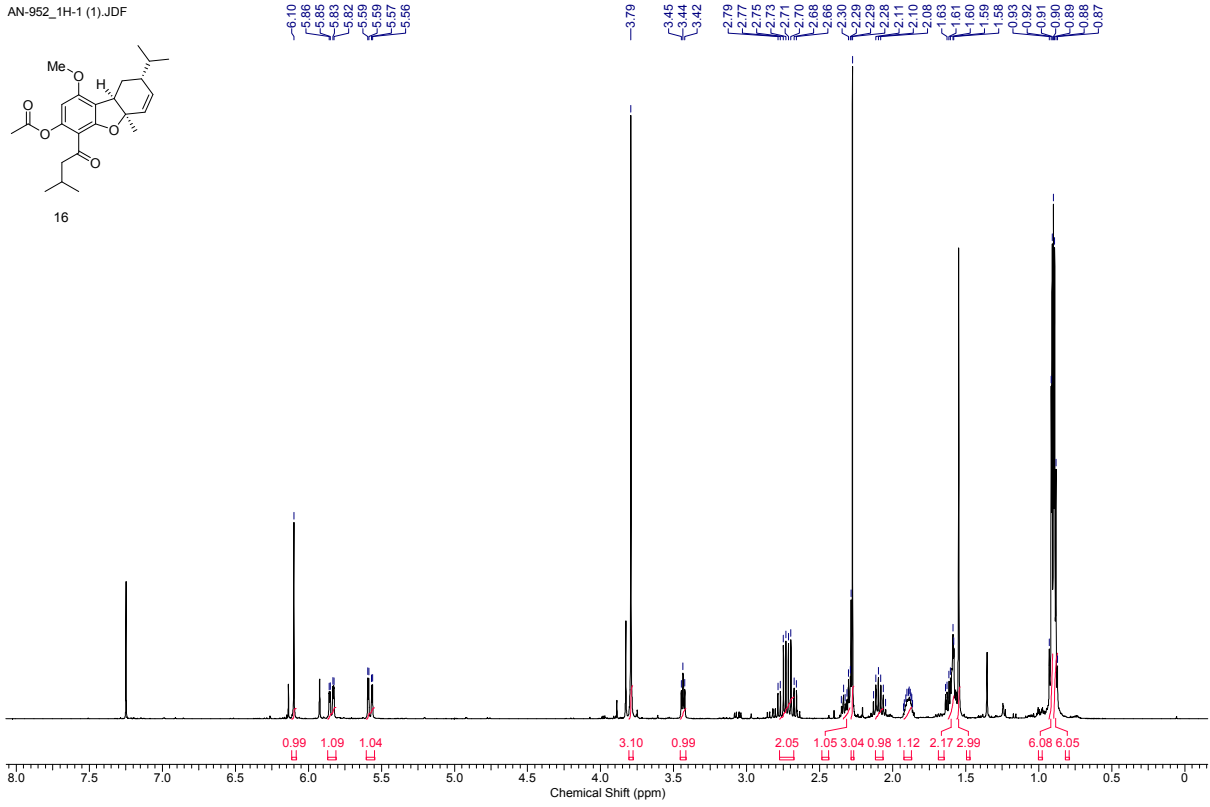

AN-952\_13C-2.JDF

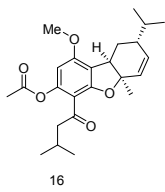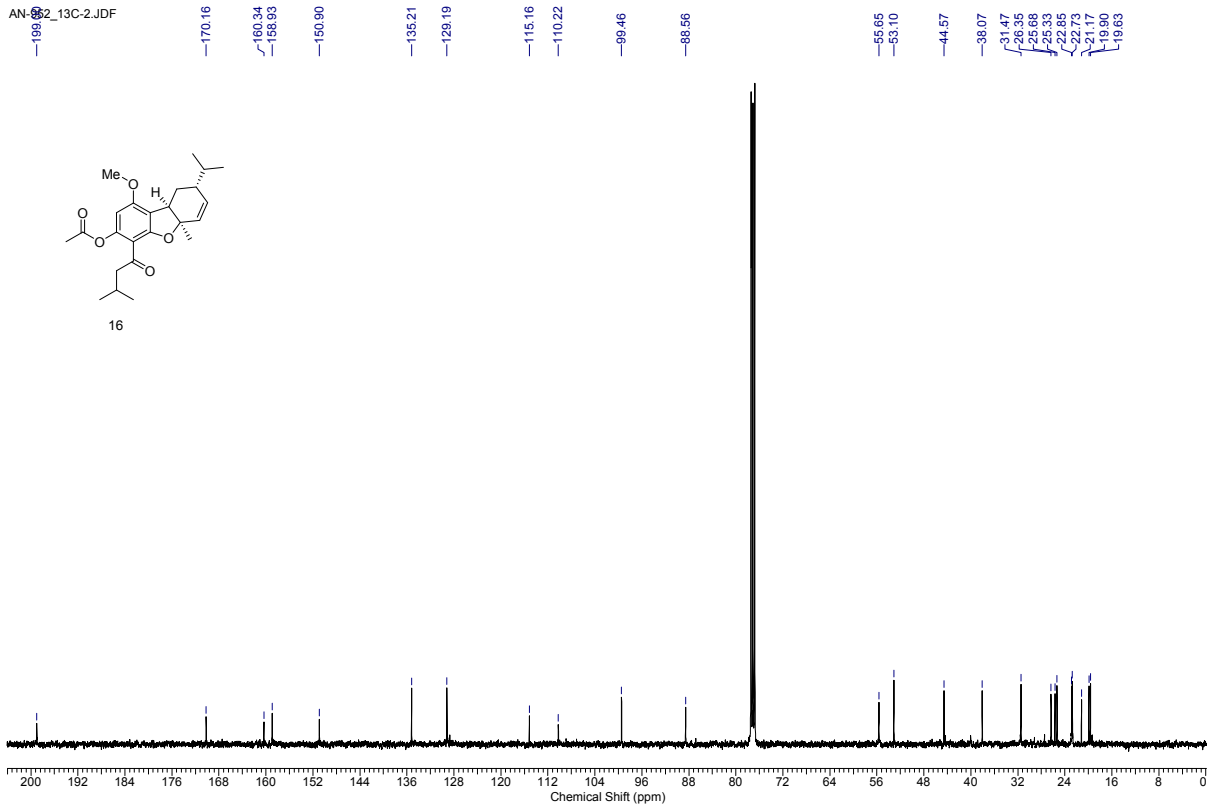

AN-956\_1H-<sup>13</sup>C(2).JDF

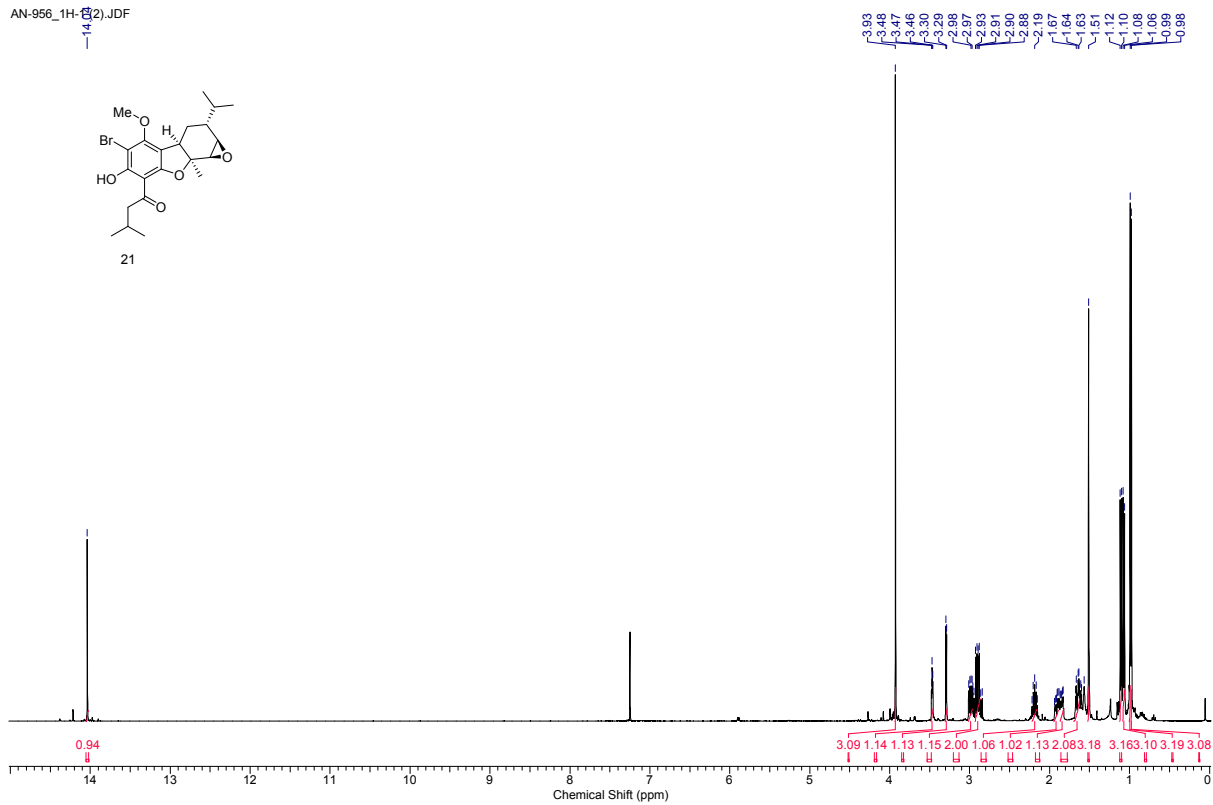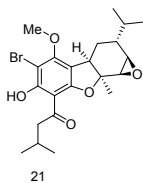

AN-956\_13C-<sup>13</sup>C(2).JDF

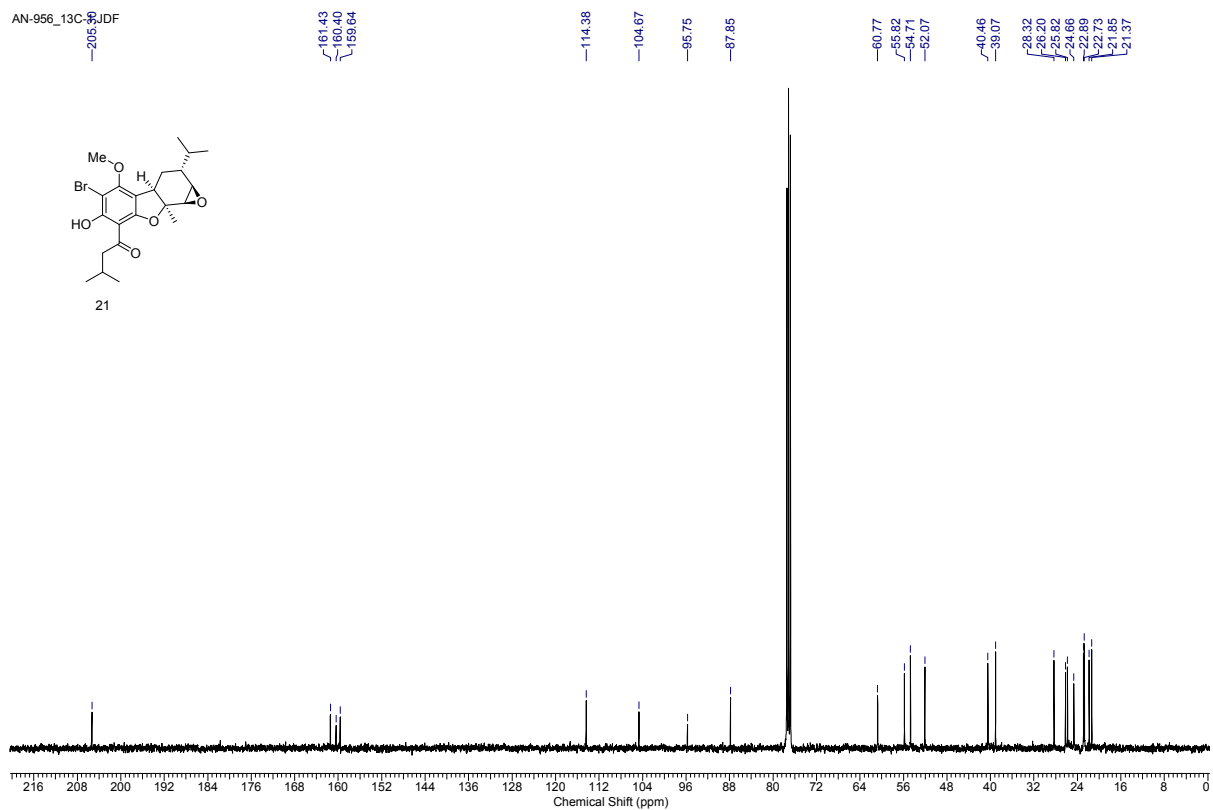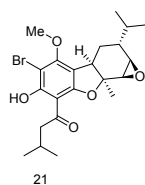

AN966A\_1H-12 (2).JDF

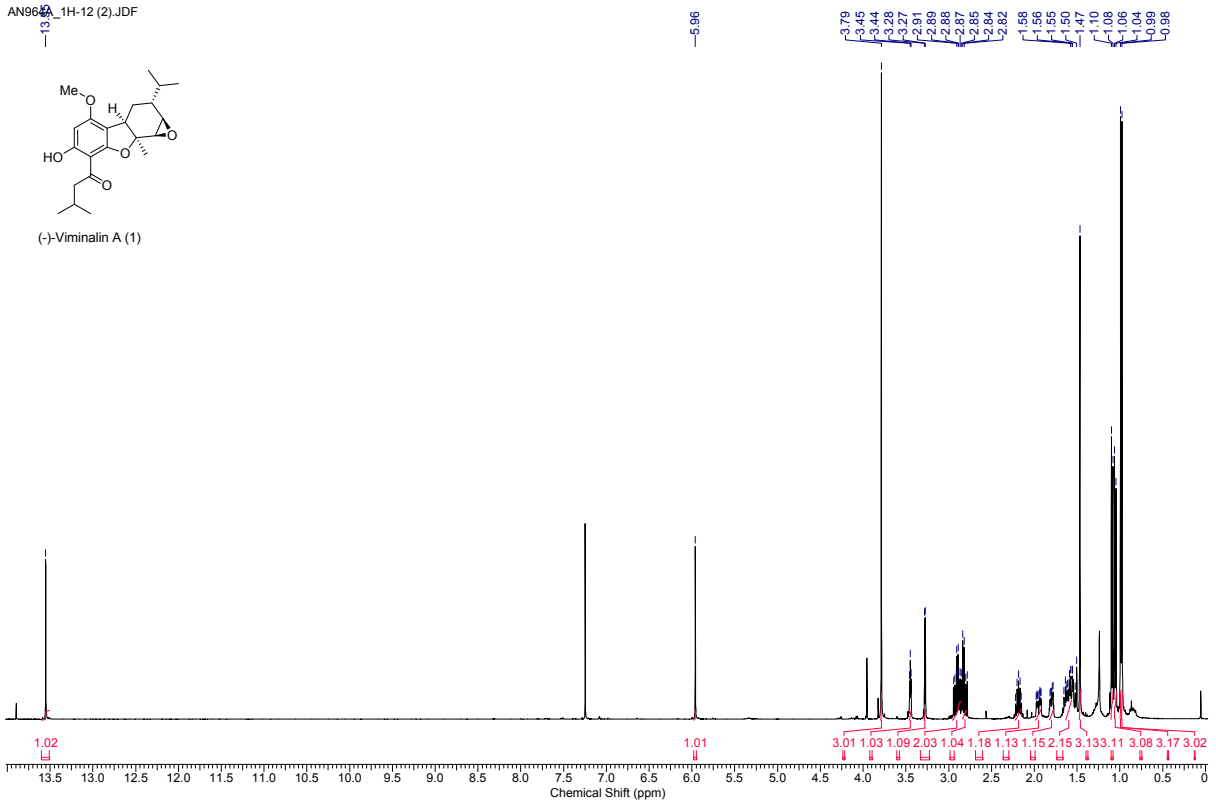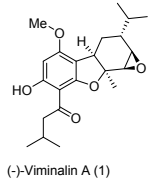

AN966A\_13C-1.JDF

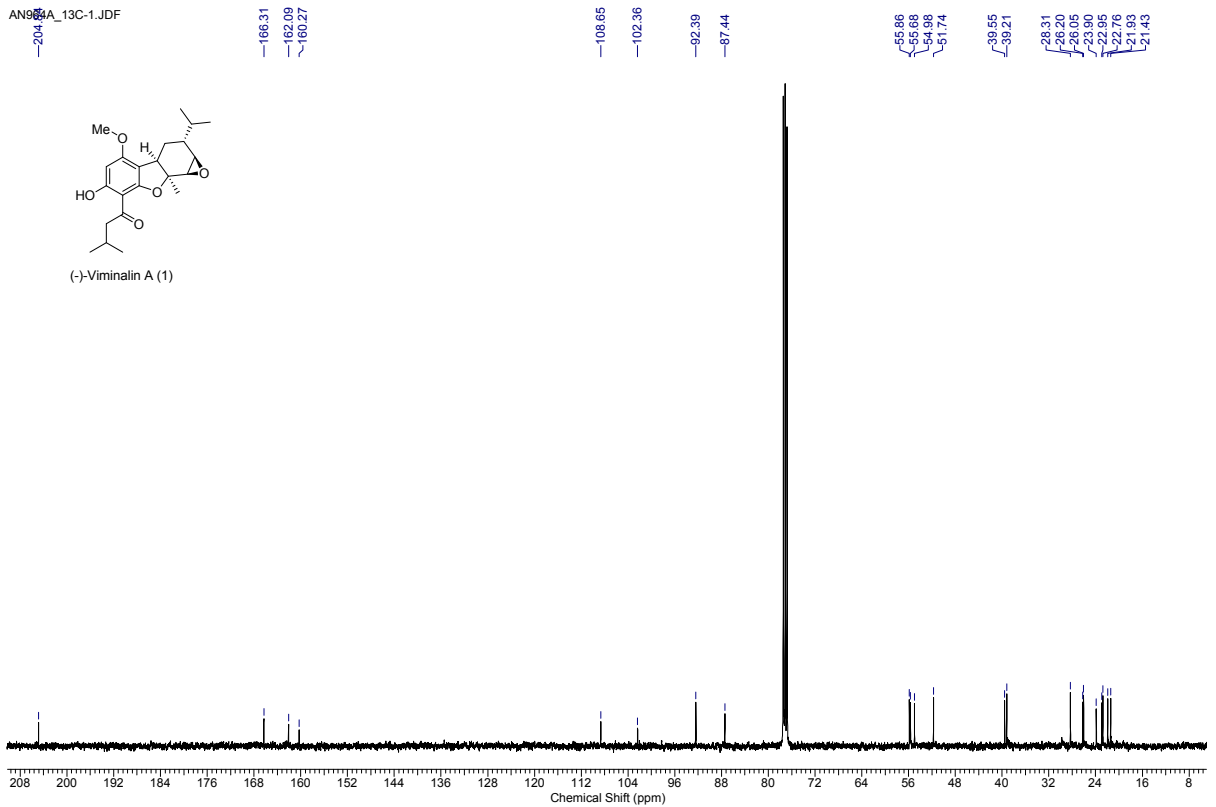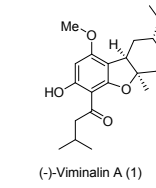

AN-993-1H-4.JDF

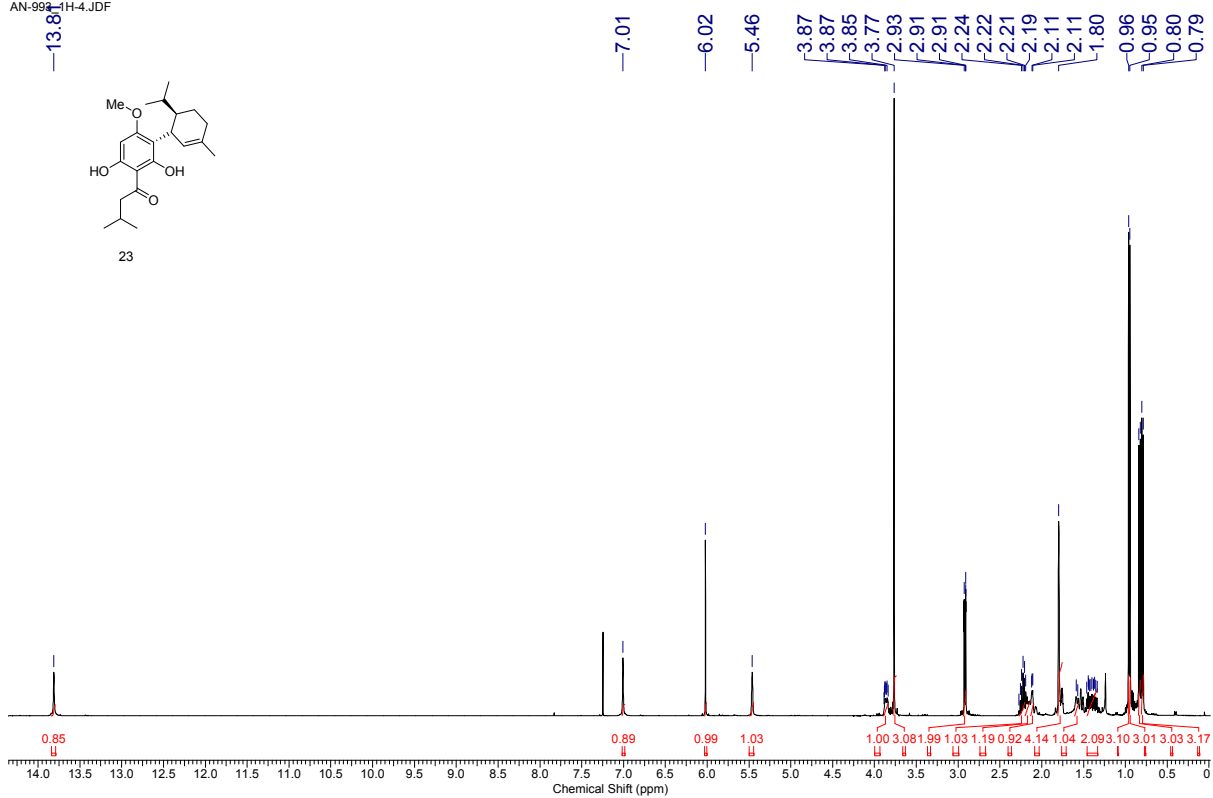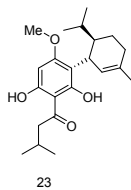

AN-993-13C-2 (2).JDF

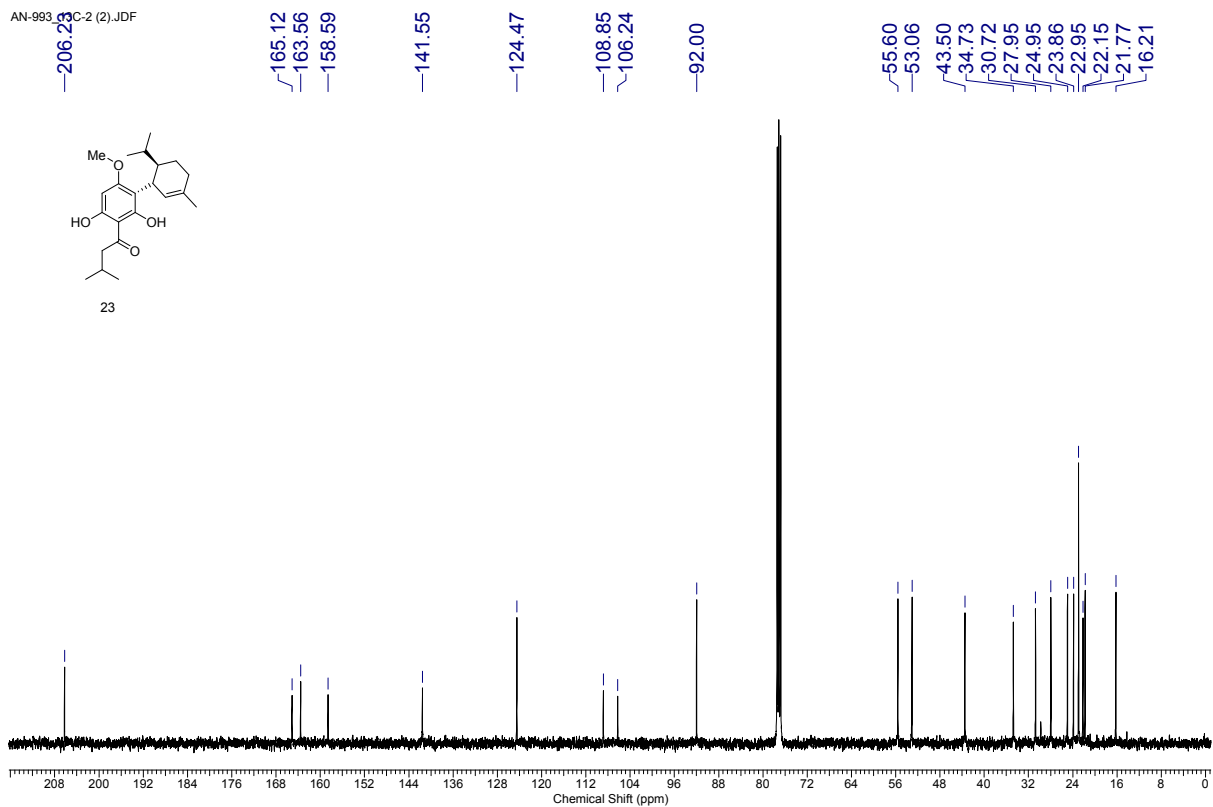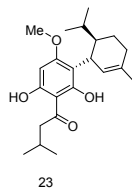

AN1004A\_PROTON-4.JDF

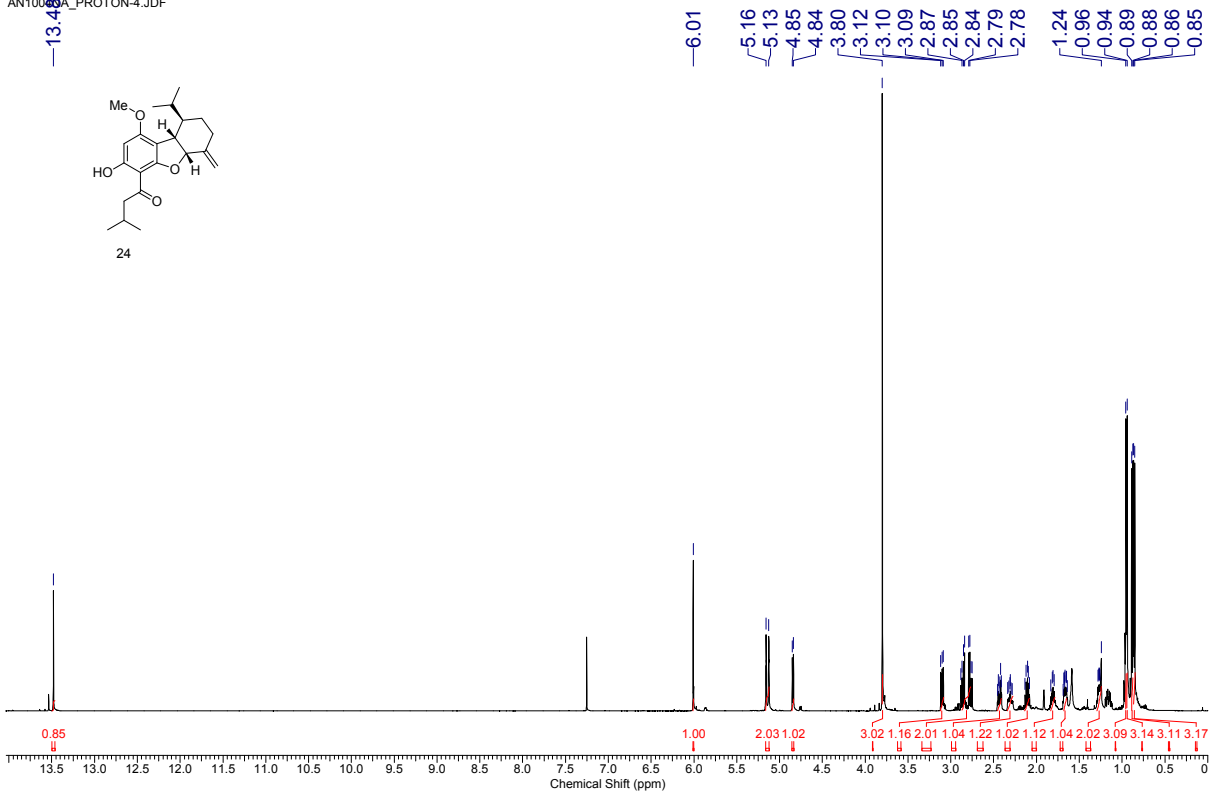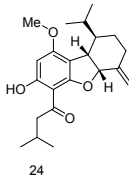

AN1004A\_CARBON-3.JDF

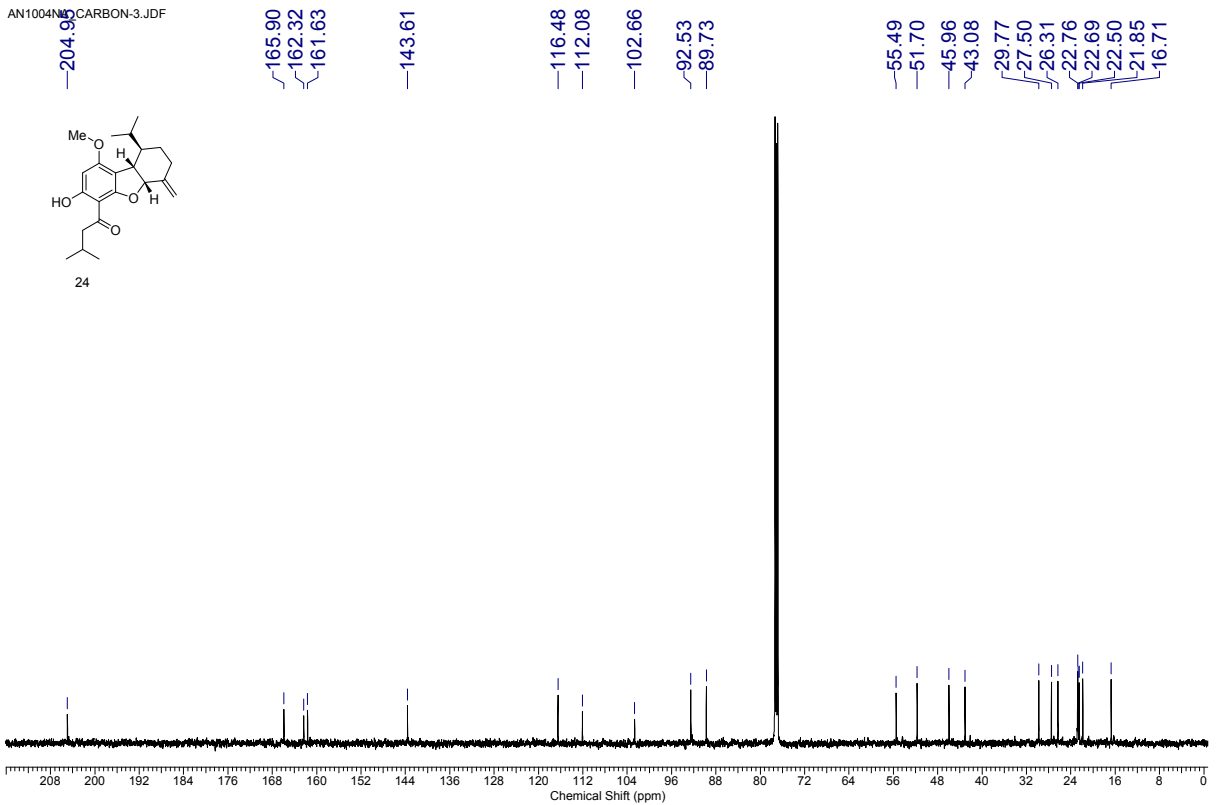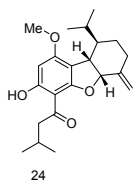

AN3009B\_1H-4 (2).JDF

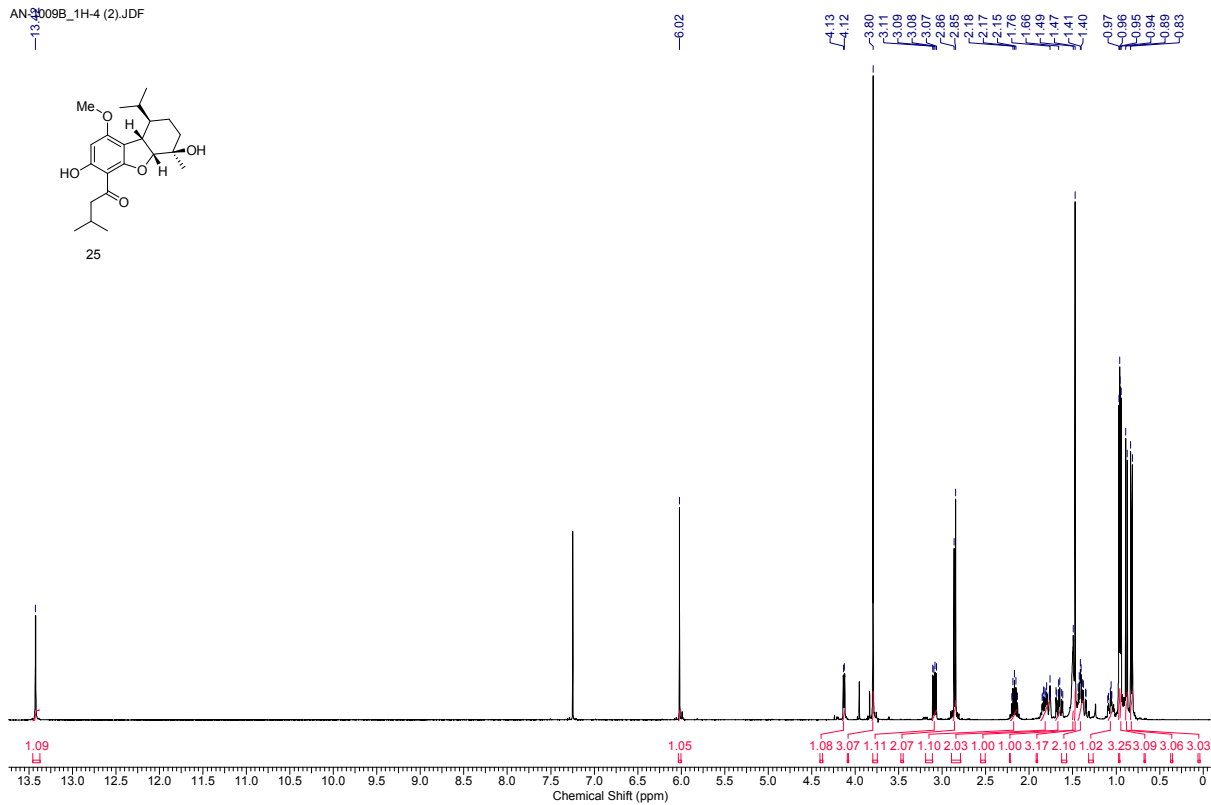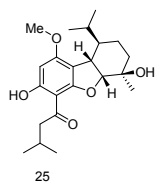

AN3012B-13C-5.JDF

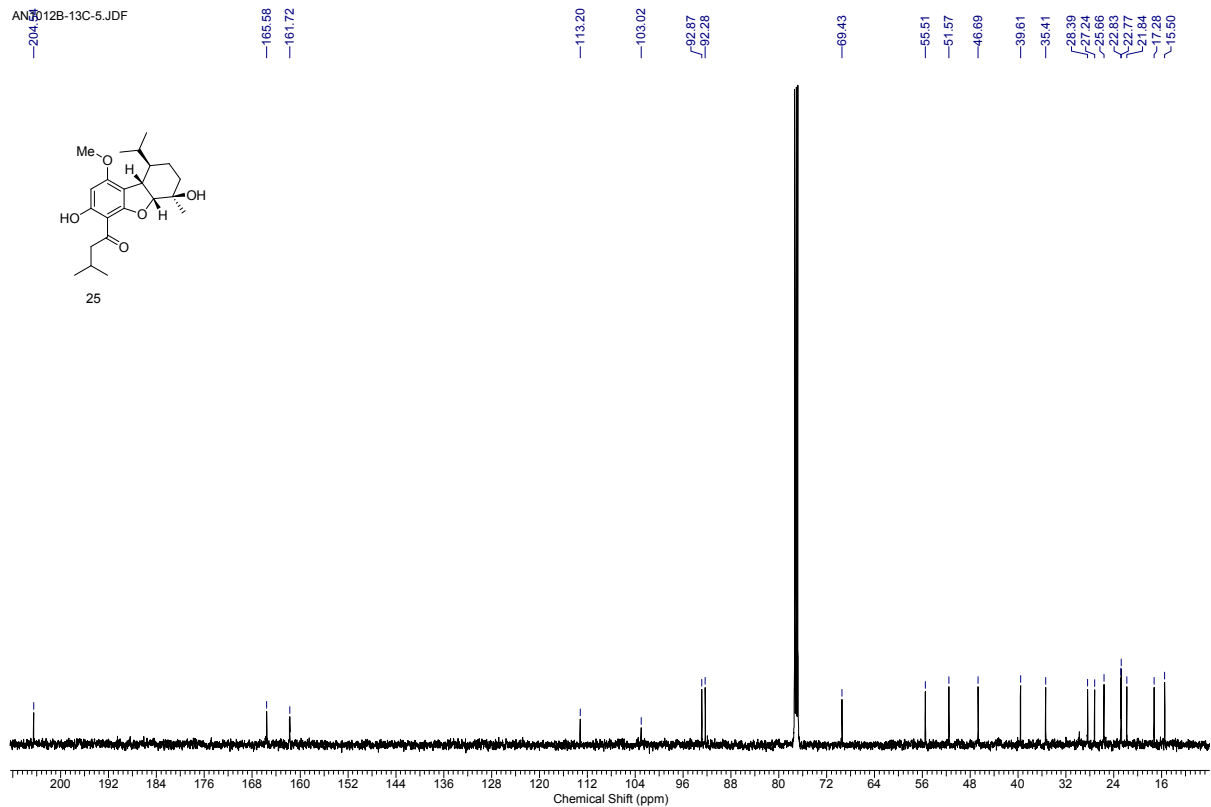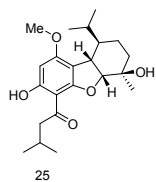

AN 131-1H-4 (1).JDF

13.88

6.01  
5.87  
5.86

4.77  
4.76

3.80  
3.10  
3.09  
3.07  
2.95  
2.92  
2.84  
2.82  
2.20  
2.19  
1.92  
1.79  
1.46  
0.98  
0.97  
0.95  
0.91  
0.88  
0.87

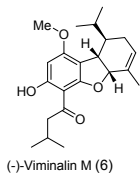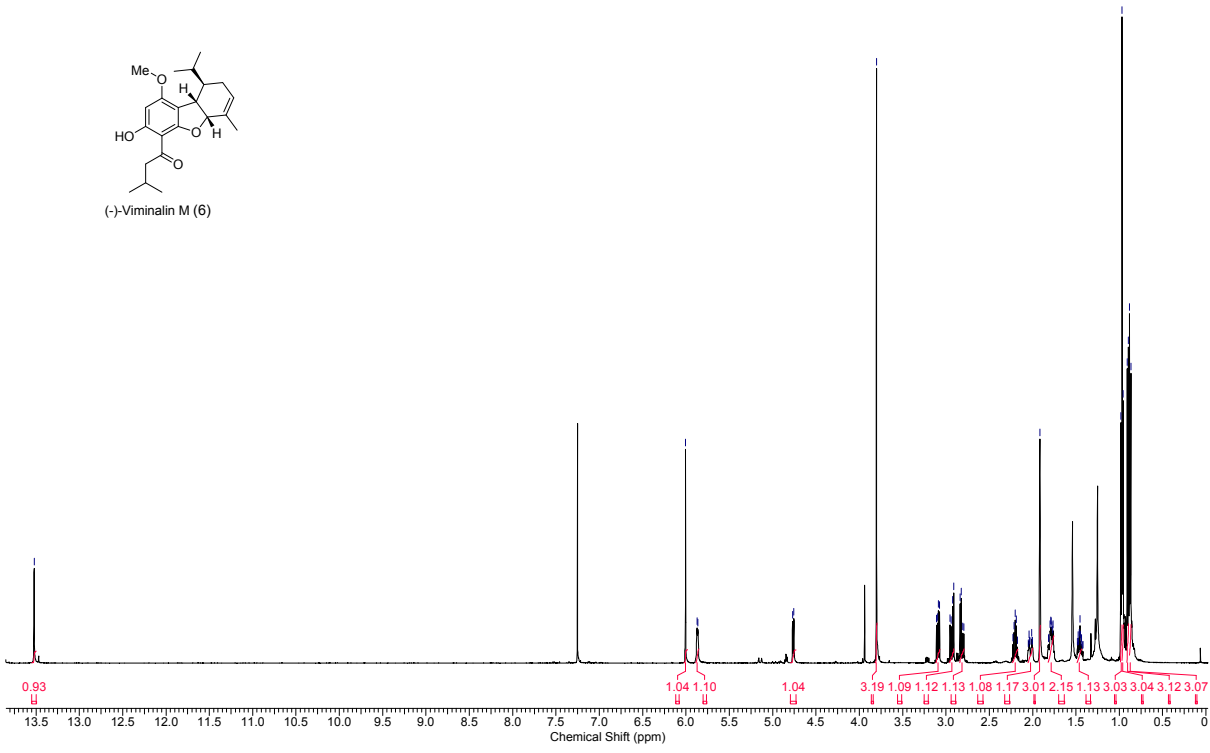

AN 131-13C-5 (2).JDF

204

165.97  
162.46  
162.34

128.71  
128.67

110.04  
102.81

92.30  
86.69

55.34  
51.66

42.17  
27.06  
26.66  
23.45  
22.85  
22.79  
21.96  
20.74  
16.26

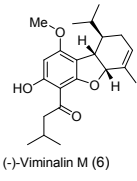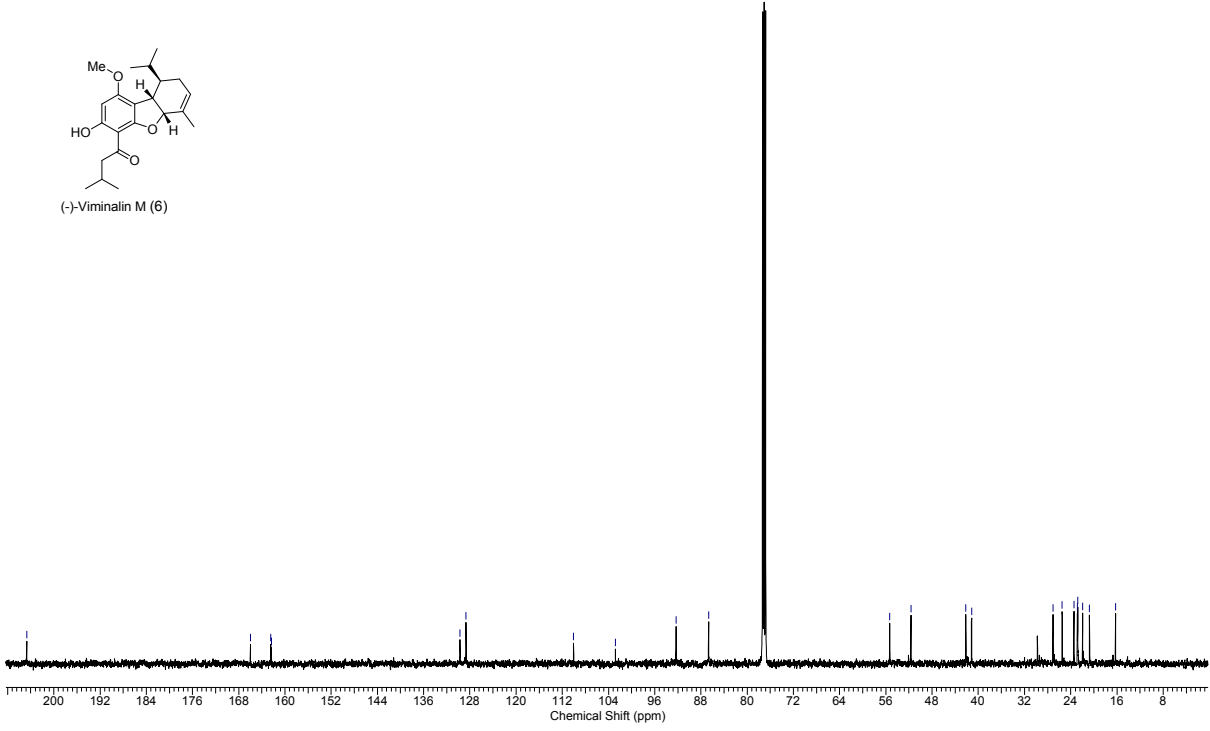



AN-92PERF\_1H-4.ESP

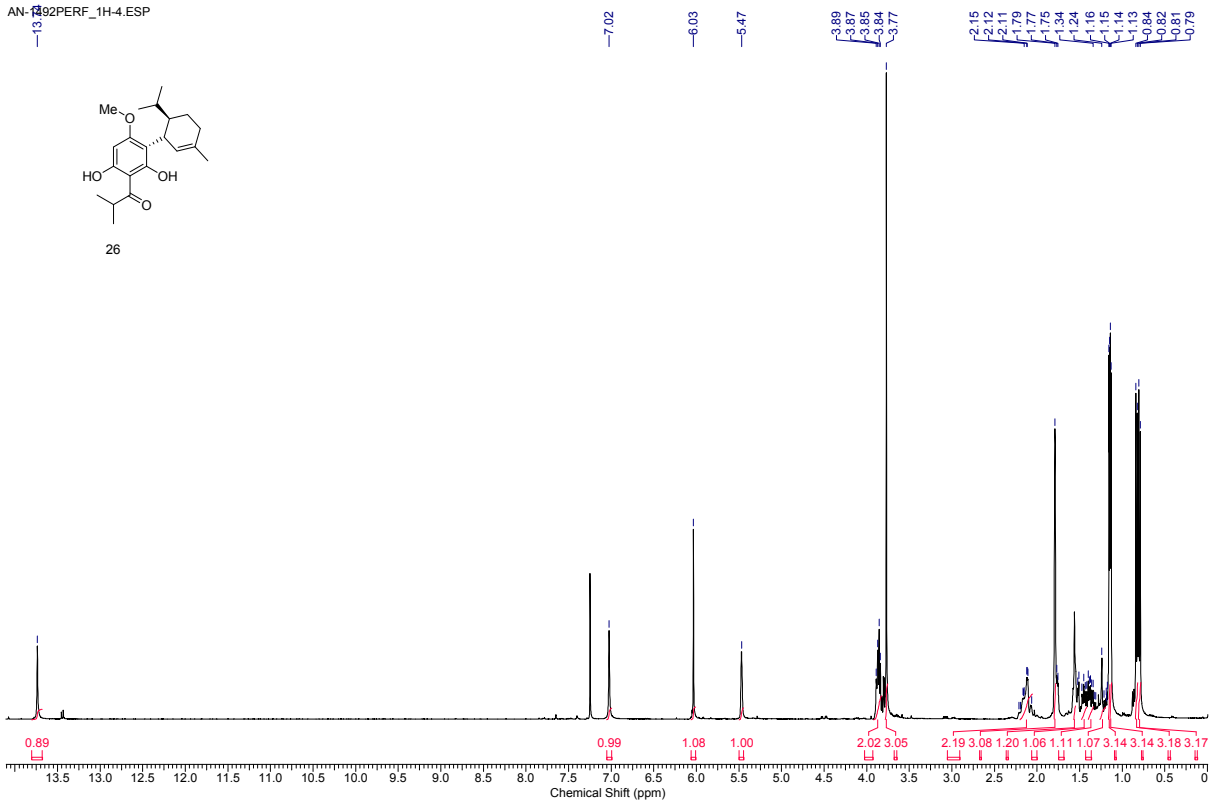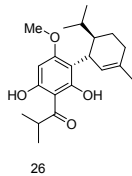

AN-92PERF\_13C-3.ESP

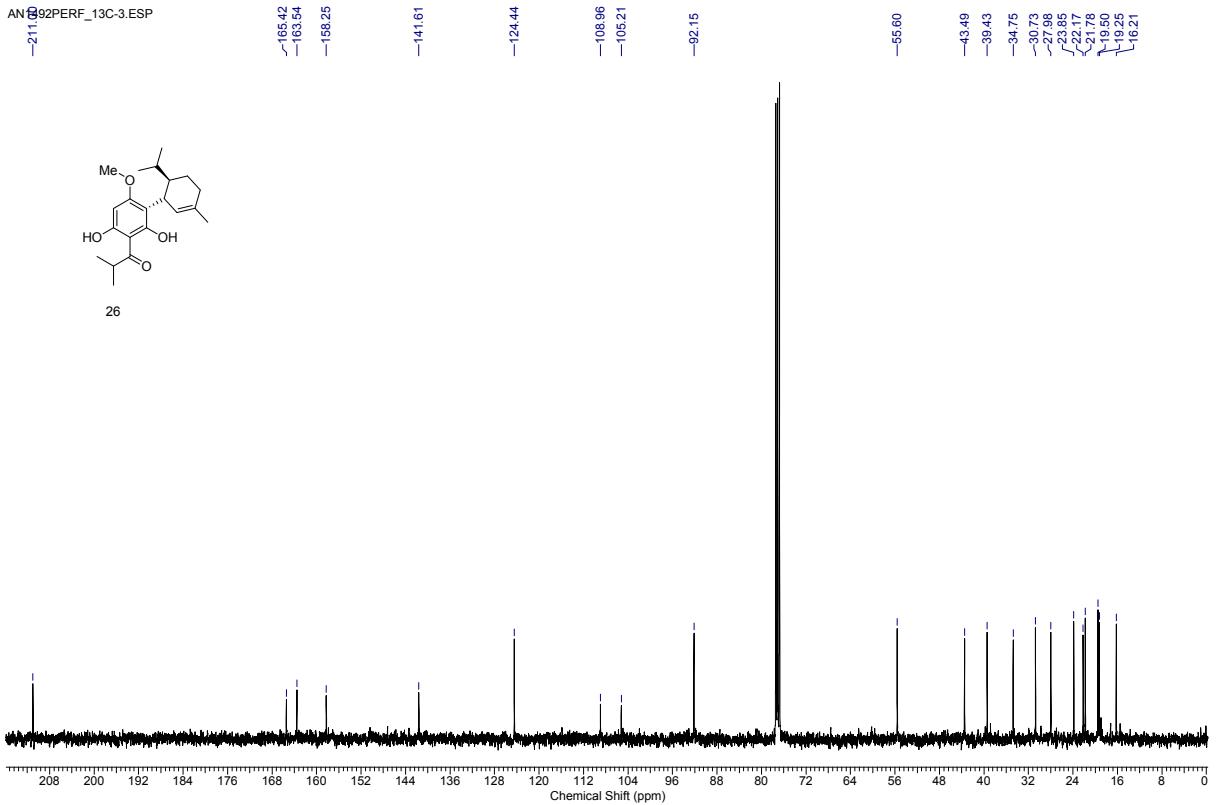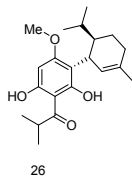

AN15194\_1H-4 (5).JDF

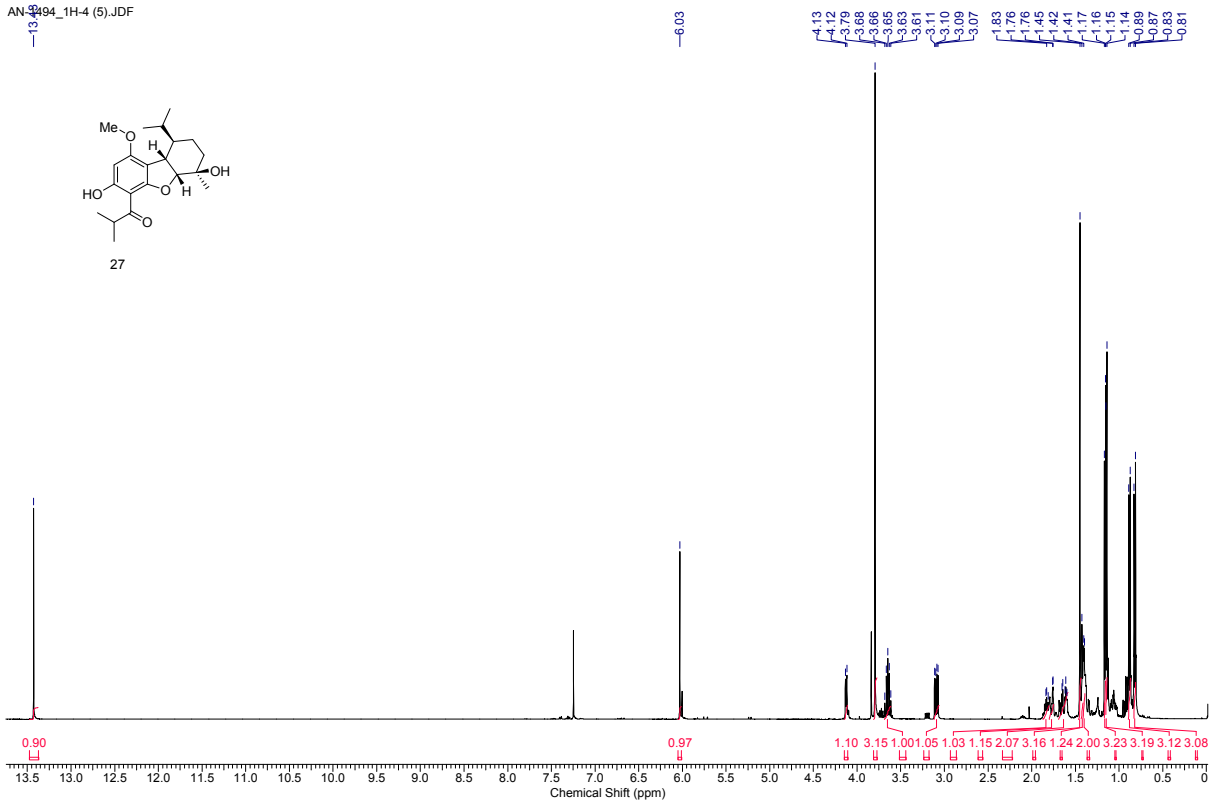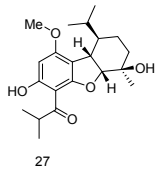

AN15194\_13C-3 (6).JDF

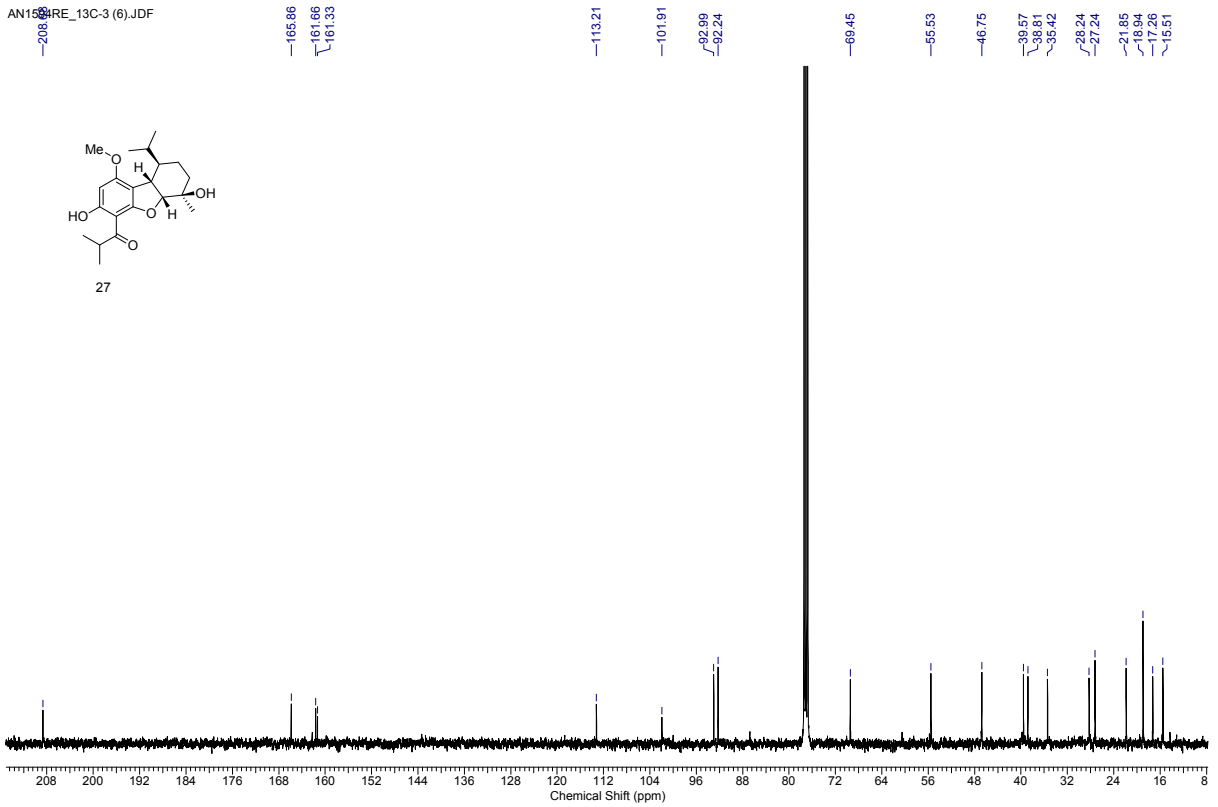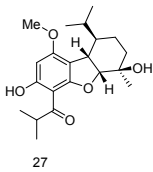

AN-1455PRA\_1H-4.ESP

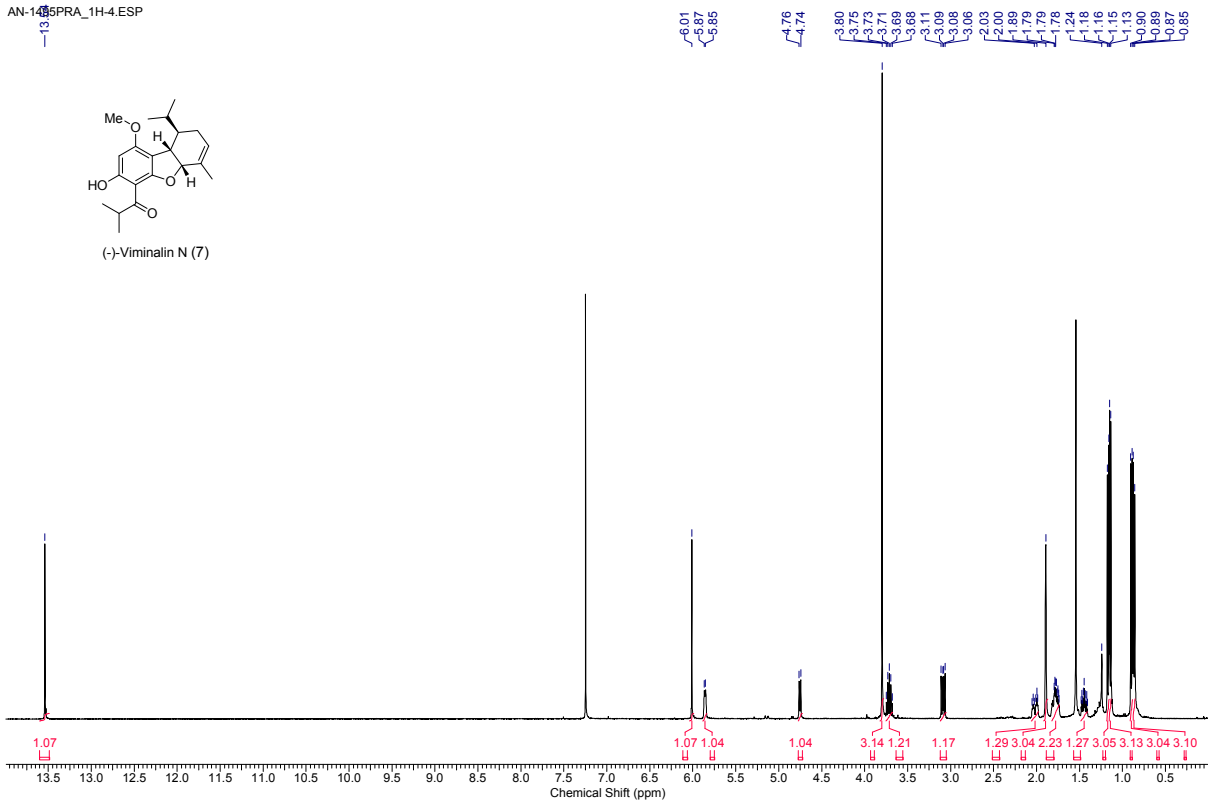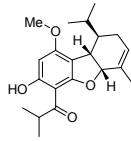

AN1455PRA\_13C-3.ESP

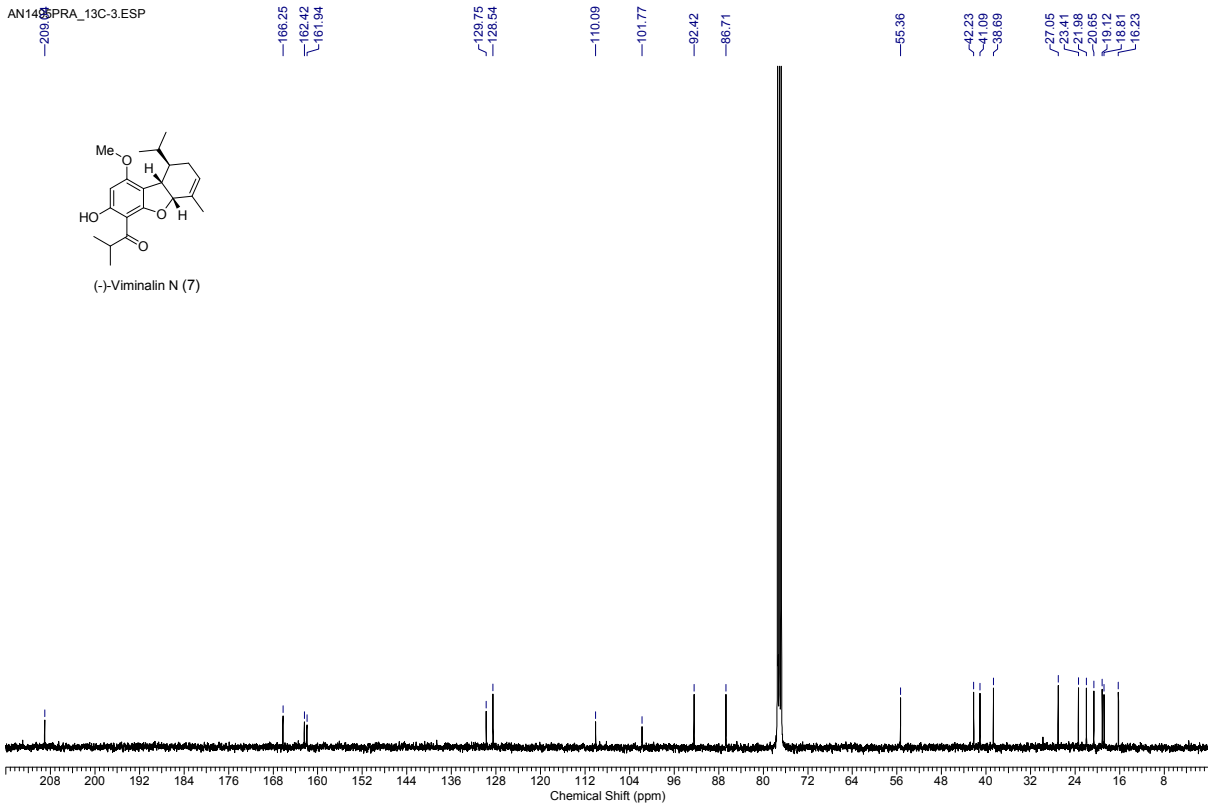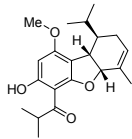

## 2. NMR comparison Table:

### <sup>1</sup>H and <sup>13</sup>C NMR comparison between natural and synthetic Viminalin A (1)

| <sup>1</sup> H-NMR in CDCl <sub>3</sub>   |                                           | <sup>13</sup> C-NMR in CDCl <sub>3</sub> |                                  |
|-------------------------------------------|-------------------------------------------|------------------------------------------|----------------------------------|
| Natural Viminalin A<br>500 MHz            | Synthetic Viminalin A<br>400 MHz          | Natural Viminalin A<br>125 MHz           | Synthetic Viminalin A<br>100 MHz |
| 0.99, (d, <i>J</i> = 7.0 Hz)              | 0.98, (d, <i>J</i> = 7.0 Hz)              | 204.8                                    | 204.8                            |
| 1.00, (d, <i>J</i> = 7.0 Hz)              | 0.99, (d, <i>J</i> = 7.0 Hz)              | 166.4                                    | 166.3                            |
| 1.06, (d, <i>J</i> = 7.0 Hz)              | 1.05, (d, <i>J</i> = 7.0 Hz)              | 162.1                                    | 162.1                            |
| 1.11, (d, <i>J</i> = 7.0 Hz)              | 1.09, (d, <i>J</i> = 7.0 Hz)              | 160.3                                    | 160.3                            |
| 1.48, (s)                                 | 1.47, (s)                                 | 108.7                                    | 108.7                            |
| 1.57, (m)                                 | 1.56, (m)                                 | 102.5                                    | 102.4                            |
| 1.64, (m)                                 | 1.63, (m)                                 | 92.4                                     | 92.4                             |
| 1.81, (m)                                 | 1.83-1.77 (m)                             | 87.5                                     | 87.4                             |
| 1.96, (ddd, <i>J</i> = 14.0, 5.5, 3.0 Hz) | 1.95, (ddd, <i>J</i> = 13.7, 5.5, 2.7 Hz) | 55.9                                     | 55.9                             |
| 2.20, (m)                                 | 2.18, (m)                                 | 55.7                                     | 55.7                             |
| 2.82, (dd, <i>J</i> = 14.0, 6.5 Hz)       | 2.83 (dd, <i>J</i> = 14.0, 6.5 Hz)        | 55.0                                     | 55.0                             |
| 2.87, (dd, <i>J</i> = 12.5, 5.5 Hz)       | 2.86 (dd, <i>J</i> = 12.5, 5.5 Hz)        | 51.7                                     | 51.7                             |
| 2.92, (dd, <i>J</i> = 14.0, 6.5 Hz)       | 2.93 (dd, <i>J</i> = 14.0, 6.5 Hz)        | 39.7                                     | 39.6                             |
| 3.28, (d, <i>J</i> = 4.0 Hz )             | 3.28 (d, <i>J</i> = 4.0 Hz)               | 39.3                                     | 39.2                             |
| 3.45, (t, <i>J</i> = 4.0 Hz)              | 3.45 (t, <i>J</i> = 4.0 Hz)               | 28.4                                     | 28.3                             |
| 3.80, (s)                                 | 3.79, (s)                                 | 26.2                                     | 26.2                             |
| 5.97, (s)                                 | 5.96, (s)                                 | 26.1                                     | 26.1                             |
| 13.55, (br. s)                            | 13.55, (s)                                | 24.0                                     | 23.9                             |
|                                           |                                           | 22.9                                     | 23.0                             |
|                                           |                                           | 22.8                                     | 22.8                             |
|                                           |                                           | 21.9                                     | 21.9                             |
|                                           |                                           | 21.4                                     | 21.4                             |

**<sup>1</sup>H and <sup>13</sup>C NMR comparison between natural and synthetic Viminalin B (2)**

| <sup>1</sup> H-NMR in CDCl <sub>3</sub>   |                                           | <sup>13</sup> C-NMR in CDCl <sub>3</sub> |                                  |
|-------------------------------------------|-------------------------------------------|------------------------------------------|----------------------------------|
| Natural Viminalin B<br>500 MHz            | Synthetic Viminalin B<br>400 MHz          | Natural Viminalin B<br>125 MHz           | Synthetic Viminalin B<br>100 MHz |
| 1.06, (d, <i>J</i> = 7.0 Hz)              | 1.05, (d, <i>J</i> = 6.9 Hz)              | 209.0                                    | 209.1                            |
| 1.10, (d, <i>J</i> = 7.0 Hz)              | 1.09, (d, <i>J</i> = 6.9 Hz)              | 166.7                                    | 166.6                            |
| 1.17, (d, <i>J</i> = 7.0 Hz)              | 1.15, (d, <i>J</i> = 7.0 Hz)              | 162.0                                    | 162.0                            |
| 1.19, (d, <i>J</i> = 7.0 Hz)              | 1.18, (d, <i>J</i> = 7.0 Hz)              | 160.0                                    | 159.9                            |
| 1.48, (s)                                 | 1.47, (s)                                 | 108.7                                    | 108.7                            |
| 1.58, (m)                                 | 1.58, (m)                                 | 101.5                                    | 101.4                            |
| 1.65, (m)                                 | 1.64, (m)                                 | 92.6                                     | 92.5                             |
| 1.82, (m)                                 | 1.84 – 1.75, (m)                          | 87.4                                     | 87.3                             |
| 1.96, (ddd, <i>J</i> = 14.0, 5.5, 3.0 Hz) | 1.95, (ddd, <i>J</i> = 14.0, 5.5, 3.0 Hz) | 55.9                                     | 55.9                             |
| 2.87, (dd, <i>J</i> = 12.5, 5.5 Hz)       | 2.86, (dd, <i>J</i> = 12.5, 5.8 Hz)       | 55.7                                     | 55.7                             |
| 3.29, (d, <i>J</i> = 4.0 Hz)              | 3.28, (d, <i>J</i> = 4.0 Hz)              | 55.0                                     | 54.9                             |
| 3.46, (t, <i>J</i> = 4.0 Hz)              | 3.45, (t, <i>J</i> = 4.0 Hz)              | 39.7                                     | 39.5                             |
| 3.79, (m)                                 | 3.80, (m)                                 | 39.4                                     | 39.2                             |
| 3.80, (s)                                 | 3.81, (s)                                 | 38.6                                     | 38.6                             |
| 5.98, (s)                                 | 5.97, (s)                                 | 28.5                                     | 28.3                             |
| 13.55, (br. s)                            | 13.60, (s)                                | 26.0                                     | 26.1                             |
|                                           |                                           | 24.0                                     | 23.9                             |
|                                           |                                           | 21.9                                     | 21.9                             |
|                                           |                                           | 21.4                                     | 21.4                             |
|                                           |                                           | 19.4                                     | 19.5                             |
|                                           |                                           | 18.6                                     | 18.5                             |

**<sup>1</sup>H and <sup>13</sup>C NMR comparison between natural and synthetic Viminalin H (3)**

| <sup>1</sup> H-NMR in CDCl <sub>3</sub> |                                     | <sup>13</sup> C-NMR in CDCl <sub>3</sub> |                                     |
|-----------------------------------------|-------------------------------------|------------------------------------------|-------------------------------------|
| Natural Viminalin H<br>500 MHz          | Synthetic Viminalin H<br>500 MHz    | Natural<br>Viminalin H<br>125 MHz        | Synthetic<br>Viminalin H<br>125 MHz |
| 0.90, (d, <i>J</i> = 7.0 Hz)            | 0.88, (d, <i>J</i> = 7.0 Hz)        | 204.8                                    | 204.8                               |
| 0.91, (d, <i>J</i> = 7.0 Hz)            | 0.91, (d, <i>J</i> = 7.0 Hz)        | 166.1                                    | 166.1                               |
| 0.97, (d, <i>J</i> = 7.0 Hz)            | 0.96, (d, <i>J</i> = 6.9 Hz)        | 162.6                                    | 162.6                               |
| 0.97, (d, <i>J</i> = 7.0 Hz)            | 0.97, (d, <i>J</i> = 6.9 Hz)        | 161.7                                    | 161.6                               |
| 1.56, (s)                               | 1.56, (s)                           | 135.3                                    | 135.3                               |
| 1.60, (m)                               | 1.60, (m)                           | 129.3                                    | 129.3                               |
| 1.60, (m)                               | 1.60, (m)                           | 107.9                                    | 107.8                               |
| 1.89, (m)                               | 1.91–1.87, (m)                      | 102.8                                    | 102.7                               |
| 2.14, (m)                               | 2.16 – 2.11, (m)                    | 92.2                                     | 92.1                                |
| 2.27, (dt, <i>J</i> = 14.0, 5.0 Hz)     | 2.27, (dt, <i>J</i> = 13.8, 5.0 Hz) | 88.7                                     | 88.7                                |
| 2.78, (dd, <i>J</i> = 14.0, 6.5 Hz)     | 2.77, (dd, <i>J</i> = 14.0, 6.6 Hz) | 55.6                                     | 55.5                                |
| 2.84, (dd, <i>J</i> = 14.0, 6.5 Hz)     | 2.84, (dd, <i>J</i> = 14.0, 6.6 Hz) | 51.7                                     | 51.7                                |
| 3.40, (t, <i>J</i> = 5.0 Hz)            | 3.39, (t, <i>J</i> = 4.8 Hz)        | 44.3                                     | 44.2                                |
| 3.81, (s)                               | 3.80, (s)                           | 38.1                                     | 38.1                                |
| 5.61, (dd, <i>J</i> = 10.0, 2.0 Hz)     | 5.60, (dd, <i>J</i> = 10.2, 2.3 Hz) | 31.5                                     | 31.5                                |
| 5.87, (dd, <i>J</i> = 10.0, 2.0 Hz)     | 5.87, (dd, <i>J</i> = 10.2, 1.9 Hz) | 26.4                                     | 26.4                                |
| 5.96, (s)                               | 5.96, (s)                           | 26.3                                     | 26.2                                |
| 13.50, (br. s)                          | 13.50, (s)                          | 26.0                                     | 26.0                                |
|                                         |                                     | 22.9                                     | 22.9                                |
|                                         |                                     | 22.8                                     | 22.7                                |
|                                         |                                     | 19.9                                     | 19.9                                |
|                                         |                                     | 19.7                                     | 19.7                                |

**<sup>1</sup>H and <sup>13</sup>C NMR comparison between natural and synthetic Viminalin I (4)**

| <b><sup>1</sup>H-NMR in CDCl<sub>3</sub></b> |                                     | <b><sup>13</sup>C-NMR in CDCl<sub>3</sub></b> |                                  |
|----------------------------------------------|-------------------------------------|-----------------------------------------------|----------------------------------|
| Natural Viminalin I<br>500 MHz               | Synthetic Viminalin I<br>400 MHz    | Natural Viminalin I<br>125 MHz                | Synthetic Viminalin I<br>100 MHz |
| 0.90, (d, <i>J</i> = 7.0 Hz)                 | 0.88, (d, <i>J</i> = 7.0 Hz)        | 209.1                                         | 209.1                            |
| 0.91, (d, <i>J</i> = 7.0 Hz)                 | 0.90, (d, <i>J</i> = 7.0 Hz)        | 166.5                                         | 166.4                            |
| 1.13, (d, <i>J</i> = 7.0 Hz)                 | 1.12, (d, <i>J</i> = 7.0 Hz)        | 162.5                                         | 162.5                            |
| 1.15, (d, <i>J</i> = 7.0 Hz)                 | 1.14, (d, <i>J</i> = 7.0 Hz)        | 161.3                                         | 161.3                            |
| 1.56, (s)                                    | 1.55, (s)                           | 135.3                                         | 135.3                            |
| 1.60, (m)                                    | 1.60, (m)                           | 129.3                                         | 129.2                            |
| 1.61, (m)                                    | 1.61, (m)                           | 107.9                                         | 107.9                            |
| 1.89, (m)                                    | 1.92 – 1.86, (m)                    | 101.6                                         | 101.7                            |
| 2.27, (dt, <i>J</i> = 14.0, 5.0 Hz)          | 2.28, (dt, <i>J</i> = 14.0, 5.0 Hz) | 92.4                                          | 92.3                             |
| 3.40, (t, <i>J</i> = 5.0)                    | 3.39, (t, <i>J</i> = 4.9)           | 88.7                                          | 88.7                             |
| 3.73, (m)                                    | 3.72, (m)                           | 55.6                                          | 55.6                             |
| 3.81, (s)                                    | 3.80, (s)                           | 44.2                                          | 44.1                             |
| 5.61, (dd, <i>J</i> = 10.0, 2.0 Hz)          | 5.60, (dd, <i>J</i> = 9.8, 2.4 Hz)  | 38.5                                          | 38.5                             |
| 5.87, (dd, <i>J</i> = 10.0, 2.0 Hz)          | 5.86, (dd, <i>J</i> = 9.8, 2.4 Hz)  | 38.2                                          | 38.1                             |
| 5.98, (s)                                    | 5.97, (s)                           | 31.5                                          | 31.5                             |
| 13.56, (br. s)                               | 13.56, (s)                          | 26.4                                          | 26.4                             |
|                                              |                                     | 26.3                                          | 26.2                             |
|                                              |                                     | 19.9                                          | 19.9                             |
|                                              |                                     | 19.7                                          | 19.7                             |
|                                              |                                     | 19.2                                          | 19.1                             |
|                                              |                                     | 18.9                                          | 18.8                             |

**<sup>1</sup>H and <sup>13</sup>C NMR comparison between natural and synthetic Viminalin M (6)**

| <b><sup>1</sup>H-NMR in CDCl<sub>3</sub></b> |                                     | <b><sup>13</sup>C-NMR in CDCl<sub>3</sub></b> |                                  |
|----------------------------------------------|-------------------------------------|-----------------------------------------------|----------------------------------|
| Natural Viminalin M<br>500 MHz               | Synthetic Viminalin M<br>500 MHz    | Natural Viminalin M<br>125 MHz                | Synthetic Viminalin M<br>125 MHz |
| 0.87, (d, <i>J</i> = 7.0 Hz)                 | 0.87, (d, <i>J</i> = 7.0 Hz)        | 204.7                                         | 204.7                            |
| 0.90, (d, <i>J</i> = 7.0 Hz)                 | 0.90, (d, <i>J</i> = 7.0 Hz)        | 166.0                                         | 166.0                            |
| 0.96, (d, <i>J</i> = 7.0 Hz)                 | 0.95, (d, <i>J</i> = 7.0 Hz)        | 162.5                                         | 162.5                            |
| 0.98, (d, <i>J</i> = 7.0 Hz)                 | 0.98, (d, <i>J</i> = 7.0 Hz)        | 162.4                                         | 162.3                            |
| 1.45, (tt, <i>J</i> = 11.0, 4.0 Hz)          | 1.45, (tt, <i>J</i> = 11.0, 4.0 Hz) | 129.8                                         | 129.7                            |
| 1.78, (m)                                    | 1.76, (m)                           | 128.7                                         | 128.7                            |
| 1.80, (m)                                    | 1.82, (m)                           | 110.1                                         | 110.0                            |
| 1.92, (s)                                    | 1.92, (s)                           | 102.9                                         | 102.8                            |
| 2.03, (dt, <i>J</i> = 17.0, 4.0 Hz)          | 2.03, (dt, <i>J</i> = 16.9, 4.0 Hz) | 92.4                                          | 92.3                             |
| 2.20, (m)                                    | 2.23 – 2.17, (m)                    | 86.7                                          | 86.7                             |
| 2.82, (dd, <i>J</i> = 15.0, 7.0 Hz)          | 2.82, (dd, <i>J</i> = 15.0, 7.0 Hz) | 55.4                                          | 55.3                             |
| 2.93, (dd, <i>J</i> = 15.0, 7.0 Hz)          | 2.93, (dd, <i>J</i> = 15.0, 7.0 Hz) | 51.7                                          | 51.7                             |
| 3.09, (dd, <i>J</i> = 11.0, 7.0 Hz)          | 3.09, (dd, <i>J</i> = 11.0, 7.0 Hz) | 42.2                                          | 42.2                             |
| 3.80, (s)                                    | 3.80, (s)                           | 41.2                                          | 41.2                             |
| 4.76, (d, <i>J</i> = 7.0 Hz)                 | 4.76, (d, <i>J</i> = 7.0 Hz)        | 27.1                                          | 27.1                             |
| 5.87, (d, <i>J</i> = 5.5 Hz)                 | 5.87, (d, <i>J</i> = 6.2 Hz)        | 25.5                                          | 25.5                             |
| 6.01, (s)                                    | 6.01, (s)                           | 23.5                                          | 23.4                             |
| 13.53, (br. s)                               | 13.52, (s)                          | 22.9                                          | 22.9                             |
|                                              |                                     | 22.8                                          | 22.8                             |
|                                              |                                     | 22.0                                          | 22.0                             |
|                                              |                                     | 20.8                                          | 20.7                             |
|                                              |                                     | 16.3                                          | 16.3                             |



**<sup>1</sup>H and <sup>13</sup>C NMR comparison between natural and synthetic Viminalin N (7)**

| <b><sup>1</sup>H-NMR in CDCl<sub>3</sub></b> |                                     | <b><sup>13</sup>C-NMR in CDCl<sub>3</sub></b> |                                     |
|----------------------------------------------|-------------------------------------|-----------------------------------------------|-------------------------------------|
| Natural viminalin N<br>600 MHz               | Synthetic viminalin N<br>400 MHz    | Natural<br>Viminalin N<br>150 MHz             | Synthetic<br>viminalin N<br>100 MHz |
| 0.87, (d, <i>J</i> = 7.0 Hz)                 | 0.86, (d, <i>J</i> = 7.0 Hz)        | 209.1                                         | 209.0                               |
| 0.91, (d, <i>J</i> = 7.0 Hz)                 | 0.90, (d, <i>J</i> = 7.0 Hz)        | 166.3                                         | 166.3                               |
| 1.15, (d, <i>J</i> = 7.0 Hz)                 | 1.14, (d, <i>J</i> = 7.0 Hz)        | 162.5                                         | 162.4                               |
| 1.18, (d, <i>J</i> = 7.0 Hz)                 | 1.17, (d, <i>J</i> = 7.0 Hz)        | 162.0                                         | 161.9                               |
| 1.46, (m)                                    | 1.45, (m)                           | 129.8                                         | 129.8                               |
| 1.80, (m)                                    | 1.82 - 1.73, (m)                    | 128.6                                         | 128.5                               |
| 1.90, (s)                                    | 1.89, (s)                           | 110.1                                         | 110.1                               |
| 2.02, (dt, <i>J</i> = 17.4, 4.1 Hz)          | 2.02, (dt, <i>J</i> = 17.4, 4.4 Hz) | 101.8                                         | 101.8                               |
| 3.10, (dd, <i>J</i> = 11.0, 7.0 Hz)          | 3.09, (dd, <i>J</i> = 11.0, 7.3 Hz) | 92.5                                          | 92.4                                |
| 3.72, (m)                                    | 3.71, (m)                           | 86.8                                          | 86.7                                |
| 3.81, (s)                                    | 3.80, (s)                           | 55.4                                          | 55.4                                |
| 4.76, (d, <i>J</i> = 7.0 Hz)                 | 4.75, (d, <i>J</i> = 7.3 Hz)        | 42.3                                          | 42.2                                |
| 5.87, (d, <i>J</i> = 5.5 Hz)                 | 5.86, (d, <i>J</i> = 5.5 Hz)        | 41.2                                          | 41.1                                |
| 6.02, (s)                                    | 6.01, (s)                           | 38.7                                          | 38.7                                |
| 13.54, (br. s)                               | 13.54, (s)                          | 27.1                                          | 27.0                                |
|                                              |                                     | 23.5                                          | 23.4                                |
|                                              |                                     | 22.0                                          | 22.0                                |
|                                              |                                     | 20.7                                          | 20.6                                |
|                                              |                                     | 19.2                                          | 19.1                                |
|                                              |                                     | 18.9                                          | 18.8                                |
|                                              |                                     | 16.3                                          | 16.2                                |

### 3. References:

1. (a) A. J. Grenning, J. H. Boyce and J. A. Porco, *J. Am. Chem. Soc.*, 2014, **136**, 11799–11804; (b) I. B. Thomsen and K. B. G. Torssell, *Acta Chemica Scandinavica*, 1991, **45**, 539–542.
